# Supplementary material for: Cohort profile – the Renal cell cancer: Lifestyle, prognosis and quality of life (ReLife) study in the Netherlands
Source: PubMed Central journal article supplement — BMJ Open. 2023 Mar 27;13(3):e066909. doi: 10.1136/bmjopen-2022-066909 (PMC10069500; doi:10.1136/bmjopen-2022-066909), 2023-03-27
Supplement: bmjopen-2022-066909.draft_revisions.pdf [file bmjopen-2022-066909.draft_revisions.pdf]

# BMJ Open

BMJ Open is committed to open peer review. As part of this commitment we make the peer review history of every article we publish publicly available.

When an article is published we post the peer reviewers' comments and the authors' responses online. We also post the versions of the paper that were used during peer review. These are the versions that the peer review comments apply to.

The versions of the paper that follow are the versions that were submitted during the peer review process. They are not the versions of record or the final published versions. They should not be cited or distributed as the published version of this manuscript.

BMJ Open is an open access journal and the full, final, typeset and author-corrected version of record of the manuscript is available on our site with no access controls, subscription charges or pay-per-view fees (<http://bmjopen.bmj.com>).

If you have any questions on BMJ Open's open peer review process please email [info.bmjopen@bmj.com](mailto:info.bmjopen@bmj.com)

# BMJ Open

## Cohort profile: The ReLife (Renal cell cancer: Lifestyle, prognosis, and quality of life) study in the Netherlands

|                               |                                                                                                                                                                                                                                                                                                                                                                                                                                                                                      |
|-------------------------------|--------------------------------------------------------------------------------------------------------------------------------------------------------------------------------------------------------------------------------------------------------------------------------------------------------------------------------------------------------------------------------------------------------------------------------------------------------------------------------------|
| Journal:                      | <i>BMJ Open</i>                                                                                                                                                                                                                                                                                                                                                                                                                                                                      |
| Manuscript ID                 | bmjopen-2022-066909                                                                                                                                                                                                                                                                                                                                                                                                                                                                  |
| Article Type:                 | Cohort profile                                                                                                                                                                                                                                                                                                                                                                                                                                                                       |
| Date Submitted by the Author: | 26-Jul-2022                                                                                                                                                                                                                                                                                                                                                                                                                                                                          |
| Complete List of Authors:     | Maurits, Jake; Radboudumc, Department for Health Evidence<br>Sedelaar, Michiel; Radboudumc, Department of Urology<br>Aben, Katja; Netherlands Cancer Registry; Radboudumc, Department for Health Evidence<br>Kampman, Ellen; Wageningen University & Research, Division of Human Nutrition and Health; Radboudumc, Department for Health Evidence<br>Kiemeneij, Lambertus; Radboudumc, Department for Health Evidence<br>Vrieling, Alina; Radboudumc, Department for Health Evidence |
| Keywords:                     | NUTRITION & DIETETICS, Kidney tumours < ONCOLOGY, Epidemiology < ONCOLOGY, PREVENTIVE MEDICINE                                                                                                                                                                                                                                                                                                                                                                                       |
|                               |                                                                                                                                                                                                                                                                                                                                                                                                                                                                                      |

SCHOLARONE™  
Manuscripts



I, the Submitting Author has the right to grant and does grant on behalf of all authors of the Work (as defined in the below author licence), an exclusive licence and/or a non-exclusive licence for contributions from authors who are: i) UK Crown employees; ii) where BMJ has agreed a CC-BY licence shall apply, and/or iii) in accordance with the terms applicable for US Federal Government officers or employees acting as part of their official duties; on a worldwide, perpetual, irrevocable, royalty-free basis to BMJ Publishing Group Ltd ("BMJ") its licensees and where the relevant Journal is co-owned by BMJ to the co-owners of the Journal, to publish the Work in this journal and any other BMJ products and to exploit all rights, as set out in our [licence](#).

The Submitting Author accepts and understands that any supply made under these terms is made by BMJ to the Submitting Author unless you are acting as an employee on behalf of your employer or a postgraduate student of an affiliated institution which is paying any applicable article publishing charge ("APC") for Open Access articles. Where the Submitting Author wishes to make the Work available on an Open Access basis (and intends to pay the relevant APC), the terms of reuse of such Open Access shall be governed by a Creative Commons licence – details of these licences and which [Creative Commons](#) licence will apply to this Work are set out in our licence referred to above.

Other than as permitted in any relevant BMJ Author's Self Archiving Policies, I confirm this Work has not been accepted for publication elsewhere, is not being considered for publication elsewhere and does not duplicate material already published. I confirm all authors consent to publication of this Work and authorise the granting of this licence.

1  
2  
3 1 **Cohort profile: The ReLife (Renal cell cancer: Lifestyle, prognosis, and quality of life)**  
4  
5 2 **study in the Netherlands**  
6

7 3  
8  
9 4 Jake. S.F. Maurits<sup>a</sup>, J.P. Michiel Sedelaar<sup>b</sup>, Katja K.H. Aben<sup>a,c</sup>, Ellen Kampman<sup>a,d</sup>, Lambertus  
10  
11 5 A.L.M. Kiemeney<sup>a,b</sup>, Alina Vrieling<sup>a</sup>  
12

13 6  
14  
15 7 <sup>a</sup> Department for Health Evidence, Radboud University Medical Center, Nijmegen, The  
16  
17 8 Netherlands

18  
19  
20  
21 9 <sup>b</sup> Department of Urology, Radboud University Medical Center, Nijmegen, The Netherlands

22  
23  
24 10 <sup>c</sup> Department of Research and Development, Netherlands Comprehensive Cancer  
25  
26 11 Organisation, Utrecht, The Netherlands

27  
28  
29 12 <sup>d</sup> Division of Human Nutrition and Health, Wageningen University, Wageningen, The  
30  
31 13 Netherlands

32  
33  
34 14  
35  
36 15 **Corresponding author:** Dr. Alina Vrieling, Radboud university medical center, Department  
37  
38 16 for Health Evidence (Mailbox 133), P.O. Box 9101, 6500 HB Nijmegen, The Netherlands.  
39  
40 17 Tel: +31 24 3616944, Fax: +31 24 3613505, e-mail: Alina.Vrieling@radboudumc.nl  
41  
42

43 18  
44  
45 19 **Keywords:** renal cell cancer, diet, lifestyle, body composition, biomarkers, quality of life,  
46  
47 20 cohort profile  
48  
49

50  
51 21  
52  
53 22 **Word count:** 2349  
54  
55  
56  
57  
58  
59  
60

**ABSTRACT****Purpose:**

The ReLife study is set up to obtain insight in the association of patient and tumour characteristics, lifestyle habits and circulating biomarkers with body composition features in patients with localized renal cell cancer (RCC). Further, it aims to assess the association of body composition features, lifestyle habits and circulating biomarkers with clinical outcomes including health-related quality of life.

**Participants:**

The ReLife study is a multicenter prospective cohort study including 369 patients with newly diagnosed stage I-III RCC recruited from January 2018-June 2021 from 18 hospitals in the Netherlands. At 3 months, 1 and 2 years after treatment, participants fill out a general questionnaire and questionnaires about their lifestyle habits (e.g. diet, physical activity, smoking, alcohol consumption), medical history, and health-related quality of life. At all 3 time points, patients wear an accelerometer (ActivPAL) and donate blood samples. CT scans for body composition analysis are collected. Permission is asked for collection of tumour samples for assessment of tumour characteristics and acquired genetic alterations. Information about disease characteristics, treatment of the primary tumour and clinical outcomes is collected from medical records by the Netherlands Cancer Registry.

**Findings to date:**

A total of 837 invited patients were eligible and 369 patients were willing to participate and included (response rate 44%). The mean age of patients was  $62.5 \pm 9.0$  years and 70% was male. The majority had stage I (65%) disease and were treated with radical nephrectomy (57%).

**Future plans:**

Data collection at 3 months and 1 years after diagnosis has been finalized and data collection at 2 years after diagnosis is expected to be finalized in June 2023. Results of studies based on this cohort are essential to develop personalized evidence-based lifestyle advice for patients with localized RCC to enable them to get more control over their own disease course.

1  
2  
3 51

4  
5 52 **STRENGTHS AND LIMITATIONS**

6  
7 53 - The ReLife study is the first population-based prospective cohort study on lifestyle-related  
8  
9 54 factors and clinical outcomes in patients with localized RCC.

10  
11 55 - Comprehensive data on lifestyle-related factors and quality of life were collected at 3 months,  
12  
13 56 1 year and 2 years after diagnosis.

14  
15 57 - Both self-reported and objective data on body composition and physical activity were  
16  
17 58 collected.

18  
19 59 - A limitation is that power for survival analyses is insufficient and future pooling with other  
20  
21 60 studies is required.  
22  
23  
24  
25  
26  
27  
28  
29  
30  
31  
32  
33  
34  
35  
36  
37  
38  
39  
40  
41  
42  
43  
44  
45  
46  
47  
48  
49  
50  
51  
52  
53  
54  
55  
56  
57  
58  
59  
60

## 61 INTRODUCTION

62 Incidence rates of kidney cancer are increasing (1), which is partly explained by the increased  
63 use of diagnostic imaging but also by the increased prevalence of obesity (2). The worldwide  
64 number of new kidney cancer cases was estimated to be over 430,000 in 2020 (3). More than  
65 90% of kidney cancers are renal cell cancers (RCC) (4). Of all RCC patients, about 70-80%  
66 are diagnosed with localised disease (stage I-III) and about 20-30% with advanced or  
67 metastatic disease (stage IV) (2). Almost all RCC patients with localised disease are treated  
68 with partial or radical nephrectomy (5). Despite this treatment, 20-30% of patients with localised  
69 disease will have a relapse or develop metastatic RCC during follow-up (6). Five-year relative  
70 survival rates are approximately 90% (stage I and II), 65% (stage III), and 12% (stage IV) (2).

71 Classical prognostic factors for localised RCC include anatomical (e.g., TNM  
72 classification), histological (e.g., tumour grade, histological subtype), clinical (e.g.,  
73 performance status, certain blood values), and molecular features (e.g., *BAP1* and *PBRM1*  
74 mutations), but the combination of these features does not have sufficient predictive accuracy  
75 (7). In order to provide tailored treatment and follow-up care, the identification of additional  
76 prognostic factors that predict the expected clinical course in each individual patient is subject  
77 of active scientific research.

78 Nowadays, more than 60% of RCC patients are overweight or obese at diagnosis (body  
79 mass index (BMI)  $\geq 25$  kg/m<sup>2</sup>) (8). A meta-analysis of prospective observational studies showed  
80 a 24% increased risk of RCC for men and a 34% increased risk for women per 5 kg/m<sup>2</sup> increase  
81 in BMI (9). It is estimated that about 17% and 24% of RCC cases are attributable to overweight  
82 in the Netherlands and in the UK, respectively (10, 11). Paradoxically, meta-analyses on BMI  
83 and survival suggest that RCC patients who were overweight or obese at diagnosis have a  
84 significantly better overall, cancer-specific, and recurrence-free survival compared with normal  
85 weight patients (12, 13). The higher risk but better prognosis with higher BMI is counterintuitive.  
86 Possibly, body composition explains part of this paradox.

87 Body composition refers to the content of fat, lean tissue and bone in the human body.  
88 The amount and distribution of these tissues may be independent of BMI; subjects with similar

1  
2  
3 89 BMI may have different amounts of visceral adipose tissue (VAT), subcutaneous adipose  
4  
5 90 tissue (SAT), skeletal muscle (SM), and intermuscular adipose tissue (IMAT). Cross-sectional  
6  
7 91 areas and mean radiodensity of these tissues can be assessed by analysis of computed  
8  
9 92 tomography (CT) scans at the level of the third lumbar vertebra (L3), using established  
10  
11 93 Hounsfield Unit (HU) thresholds for each tissue. Cross-sectional total adipose tissue (TAT) and  
12  
13 94 SM areas at L3 are linearly related to body TAT and SM mass (14-16).

15 95 High VAT mass, low SM index (SMI (SM/height<sup>2</sup>)), and low SM radiodensity (SMD) have  
16  
17 96 been associated with adverse postoperative (17) and survival outcomes (18-20) in several  
18  
19 97 cancer types. In our meta-analysis, we showed that low SMI and low SMD are also associated  
20  
21 98 with increased overall mortality in patients with metastatic RCC (21). No meta-analysis could  
22  
23 99 be performed for localized RCC due to the limited number of studies and heterogeneity in body  
24  
25 100 composition parameters and outcomes (21). One study also suggested an association of low  
26  
27 101 vs. high SMI with higher overall and cancer-specific mortality (22) while other studies found  
28  
29 102 that low vs. high VAT was associated with a higher risk of recurrence (23) or cancer-specific  
30  
31 103 mortality (24, 25).

32  
33  
34 104 Body composition is known to differ by age, gender and race (26, 27). Studies on the  
35  
36 105 association of tumour characteristics with body composition features are inconsistent (28, 29)  
37  
38 106 and studies on the association of lifestyle habits and circulating biomarkers with body  
39  
40 107 composition parameters are not available in patients with RCC. Smoking has been associated  
41  
42 108 with increased RCC risk and RCC-specific mortality (30). Studies on dietary factors and  
43  
44 109 physical activity are inconsistent for RCC risk (31) and not available for clinical outcomes  
45  
46 110 including health-related quality of life (HRQoL). Some studies suggest that circulating  
47  
48 111 biomarkers (e.g. adiponectin, leptin and CRP) are associated with tumour size (32), invasion,  
49  
50 112 progression or metastasis (32-34) and survival (35, 36) in patients with RCC but results are  
51  
52 113 inconsistent.

53  
54  
55 114 Thus, the association of patient and tumour characteristics, lifestyle habits and circulating  
56  
57 115 biomarkers with body composition features in patients with localized RCC needs to be clarified.  
58  
59 116 Further, there is a clear need to obtain more insight in body composition features and lifestyle

1  
2  
3  
4  
5  
6  
7  
8  
9  
10  
11  
12  
13  
14  
15  
16  
17  
18  
19  
20  
21  
22  
23  
24  
25  
26  
27  
28  
29  
30  
31  
32  
33  
34  
35  
36  
37  
38  
39  
40  
41  
42  
43  
44  
45  
46  
47  
48  
49  
50  
51  
52  
53  
54  
55  
56  
57  
58  
59  
60

117 habits and their relation with clinical outcomes in patients with localized RCC. This information  
118 is essential to develop personalized evidence-based lifestyle advice for patients with localized  
119 RCC to improve their clinical outcomes.

For peer review only

## 120 COHORT DESCRIPTION

### 121 Setting

122 The ReLife study (**Renal cell cancer: Lifestyle, prognosis, and quality of Life**) is a prospective  
123 cohort study including patients with newly diagnosed pathologically confirmed primary stage I-  
124 III RCC. The study has been designed to evaluate 1) the association of patient and tumour  
125 characteristics, lifestyle habits, and circulating biomarkers with body composition features, and  
126 2) the association of body composition features, lifestyle habits and circulating biomarkers with  
127 clinical outcomes, including HRQOL. Patients were recruited in 18 hospitals in the East, South,  
128 and Central parts of the Netherlands. Before the start of the study, permission was asked from  
129 all urologists of the participating hospitals to select and invite eligible patients from the  
130 Netherlands Cancer Registry (NCR), held by the Netherlands Comprehensive Cancer  
131 Organisation (IKNL). Once every 2 weeks, newly diagnosed patients were identified through  
132 IKNL using notification lists of the Pathological Anatomical National Automate Archive (PALGA  
133 foundation) in the Netherlands. Approximately 10 weeks after treatment (surgery or ablation),  
134 patients were invited on behalf of their urologist to participate in this study (**Figure 1**). Patients  
135 who agreed to participate provided a written informed consent. Enrolment started in January  
136 2018 and ended in June 2021 and collection of follow-up data is still ongoing.

137

138 **Figure 1** Timeline and study design of the ReLife study

139

### 140 Patient and public involvement

141 Four patient representatives were asked for feedback on the grant proposal and one patient  
142 representative was involved in the design and set-up phase of the study. Patients were not  
143 involved in the conducting of this research, but will be involved in the reporting and dissemination  
144 plans regarding information provision to patients. Results from the study will be communicated  
145 to participants and urologists from the participating hospitals through the study website  
146 ([www.radboudumc.nl/trials/relife](http://www.radboudumc.nl/trials/relife)), through newsletters and through the website of the patient  
147 society. Results will be submitted for publication in peer-reviewed journals and presented at

1  
2  
3 148 relevant (inter)national conferences.  
4

5 149

## 7 150 **Participants**

9 151 Eligible participants were Dutch speaking patients between 18 and 75 years old who were  
11 152 newly diagnosed with a histologically confirmed primary stage I-III RCC tumour and who  
13 153 underwent a (partial) nephrectomy or ablation. Patients with a previous diagnosis of cancer in  
15 154 the five years before RCC diagnosis and those with a lymph node metastasis or distant  
17 155 metastasis were not eligible.  
19

20 156

## 22 157 **Data collection and management**

### 24 158 *Questionnaires*

26 159 Participants are asked to complete self-administered web-based or paper-and-pencil-based  
28 160 questionnaires at 3 months (T3mo), 1 year (T1y) and 2 years (T2y) after treatment (**Figure 1,**  
30 161 **Table 1**). Web-based questionnaires are collected using Castor EDC. Follow-up telephone  
32 162 calls are made to non-responding participants and to respondents whose questionnaires have  
34 163 missing items.

36 164 The general questionnaire at T3mo contains questions on demographics (age, sex, ethnicity,  
38 165 education, living situation, occupation, marital status) and personal and family history of  
40 166 cancer. All questionnaires collect information about height, body weight, amount and  
42 167 frequency of alcohol consumption during week- and weekend days, smoking habits,  
44 168 comorbidities and the use of dietary supplements and medication. Information on smoking  
46 169 habits is collected in detail, including age or date of starting and stopping smoking, number of  
48 170 cigarettes smoked per day, and duration of smoking. Information about habitual physical  
50 171 activity is collected by using the previously validated Short Questionnaire to Assess Health  
52 172 (SQUASH) (37), which is fairly reliable and valid in an adult population (37-39). The SQUASH  
54 173 questionnaire assesses the average time, i.e. number of days per week and hours and  
56 174 minutes per day, spent in commuting activities, leisure time activities, household activities,  
58  
59  
60

175 **Table 1.** Overview of data collection in ReLife at the three time points after treatment

|                                       | Measures                                                                                                                                                    | T3mo           | T1y            | T2y            |
|---------------------------------------|-------------------------------------------------------------------------------------------------------------------------------------------------------------|----------------|----------------|----------------|
| <b>Questionnaires</b>                 |                                                                                                                                                             |                |                |                |
| <i>Sociodemographic data</i>          | Date of birth, gender, country of birth of participant, father, mother, race, living situation, marital status, highest level of education, working history | X              |                |                |
| <i>Anthropometry</i>                  | Height at baseline, weight two years before diagnosis, weight loss 3-6 months before diagnosis, average weight during adult life                            | X              |                |                |
|                                       | Current body weight, waist and hip circumference                                                                                                            | X              | X              | X              |
| <i>Lifestyle</i>                      | Current and past smoking behaviour including dose and duration, alcohol consumption, (reasons for) changes in eating habits, mobility                       | X              | X              | X              |
|                                       | Short Questionnaire to Assess Health-enhancing physical activity (29)                                                                                       | X              | X              | X              |
|                                       | Frequency and amount of alcohol consumption during week and weekend days (32-34)                                                                            | X              | X              | X              |
|                                       | Changes in eating habits and reasons for/type of changes                                                                                                    |                | X              | X              |
| <i>Medical history</i>                | Previously diagnosed with cancer, family history of cancer                                                                                                  | X              |                |                |
|                                       | Comorbidities, medication use, dietary supplement use                                                                                                       | X              | X              | X              |
| <i>Diet</i>                           | 163- item Food Frequency Questionnaire                                                                                                                      | X              | X              | X              |
| <i>Health-related quality of life</i> | EORTC QLQ-C30 (36)                                                                                                                                          | X              | X              | X              |
| <b>Accelerometer</b>                  |                                                                                                                                                             |                |                |                |
|                                       | Habitual physical (in)activity, sedentary behavior                                                                                                          | X              | X              | X              |
| <b>Blood</b>                          |                                                                                                                                                             |                |                |                |
|                                       | EDTA whole blood for DNA isolation                                                                                                                          | X              |                |                |
|                                       | EDTA plasma, serum                                                                                                                                          | X              | X              | X              |
| <b>Tissue</b>                         |                                                                                                                                                             |                |                |                |
|                                       | Formalin-fixed paraffin-embedded tissue of the primary tumour                                                                                               | X <sup>a</sup> |                |                |
| <b>CT scan</b>                        |                                                                                                                                                             |                |                |                |
|                                       | Diagnostic CT scan                                                                                                                                          | X              |                |                |
|                                       | Follow-up CT scans                                                                                                                                          |                | X <sup>b</sup> | X <sup>b</sup> |
| <b>Clinical data</b>                  |                                                                                                                                                             |                |                |                |
|                                       | Disease characteristics, treatment                                                                                                                          | X              | X              | X              |
|                                       | Postoperative outcomes, recurrence and progression                                                                                                          | X              | X              | X              |

176 <sup>a</sup> To date only permission, no actual collection.; <sup>b</sup> Dependent on availability.

1  
2  
3 177 and activities at work in a normal week in the past month. At all three time points, patients  
4  
5 178 are also asked to measure and report their waist and hip circumference.  
6

7 179  
8  
9 180 Habitual dietary intake is collected at all three time points using a 163-item validated and  
10  
11 181 reproducible self-administered food frequency questionnaire that was developed by  
12  
13 182 Wageningen University (40-42). The questionnaire contains questions about the frequency of  
14  
15 183 consumption of food products and the portion size during the previous month. Frequency and  
16  
17 184 portion size of consumed food products are multiplied to obtain their intake in grams per day.  
18  
19 185 Nutrient intake is calculated using the Dutch Food Composition Table (NEVO 2010) (43).  
20  
21 186

22  
23  
24 187 Health-related quality of life is assessed at all three time points with the validated EORTC QLQ-  
25  
26 188 C30 (44). The EORTC QLQ-C30 contains five function scales (physical, role, cognitive,  
27  
28 189 emotional and social functioning), three symptom scales (fatigue, nausea, pain and vomiting)  
29  
30 190 and six single items (dyspnea, insomnia, loss of appetite, constipation, diarrhea, and financial  
31  
32 191 impact), all scored from 1 (not at all) to 4 (very much)) and a global health status scale with  
33  
34 192 ranges from 1 (very poor) to 7 (excellent). All scores will be linearly transformed to a 0 to 100  
35  
36 193 scale.  
37  
38

39 194

#### 40 195 *Accelerometer*

41  
42  
43 196 Habitual physical (in)activity is objectively measured at all three time points using the activPAL  
44  
45 197 physical activity monitor (PAL Technologies, Glasgow, UK). This accelerometer has shown to  
46  
47 198 be an accurate tool for measuring daily physical activity levels (45). Participants are asked to  
48  
49 199 wear the device continuously on the front right thigh for seven consecutive days. Data are  
50  
51 200 uploaded using the activPAL software.  
52

53 201

#### 54 202 *Blood samples*

55  
56  
57 203 Non-fasting blood samples are collected at all three time points. At T3mo, 10 ml EDTA  
58  
59 204 whole blood (for DNA isolation), 10 ml EDTA plasma and 8.5 ml serum is collected. At  
60

1  
2  
3 205 the other two time points, 10 ml EDTA plasma and 8.5 ml serum is collected. All blood  
4  
5 206 samples are collected, processed and stored at -80°C locally in the participating hospitals  
6  
7 207 according to a standard protocol before transportation on dry ice to the Radboud Biobank.  
8  
9 208 The blood samples are stored in the Radboud Biobank at -80°C for future analyses of  
10  
11 209 genetic and other biomarkers. Analysis of adiponectin, leptin, and CRP by the Laboratory  
12  
13 210 for Experimental Internal Medicine of Radboudumc using commercially available  
14  
15 211 enzyme-linked immunosorbent assays is planned.  
16  
17  
18 212

### 19 213 *Tumour samples*

20  
21  
22 214 From all patients, permission for collection of tumour specimens is requested for potential  
23  
24 215 future assessment of tumour characteristics (e.g. tumour necrosis) and acquired genetic  
25  
26 216 alterations (e.g. in the *BAP1* or *PBRM1* genes) (5). Tumour blocks can be identified by using  
27  
28 217 the PALGA foundation and retrieved using the Dutch National Tissuebank Portal (DNTP) from  
29  
30 218 the local pathology laboratories.  
31  
32  
33 219

### 34 220 *CT scans*

35  
36 221 CT scans are retrieved from medical records of all patients for the assessment of body  
37  
38 222 composition. Diagnostic CT scans are available from almost all RCC patients as they are used  
39  
40 223 for diagnosis and staging of the disease. If available, follow-up CT scans are collected as well.  
41  
42 224 From these CT scans, cross-sectional areas (cm<sup>2</sup>) and mean radiodensity of SM, VAT, SAT  
43  
44 225 and IMAT are quantified at the landmark level of the third lumbar vertebra (L3).  
45  
46  
47 226

### 48 227 *Clinical data*

49  
50  
51 228 Information about disease characteristics and treatment for the initial tumour and subsequent  
52  
53 229 recurrences is collected from the medical records by data managers of the Netherlands Cancer  
54  
55 230 Registry. Information about tumour characteristics includes incidence date, clinical (cTNM) and  
56  
57 231 post-surgical (pTNM) stage, tumour grade and histology. With respect to therapy, information  
58  
59 232 is collected on type of treatment (type of nephrectomy, type of ablation), operation time, blood

1  
2  
3 233 loss, complications (Clavien-Dindo classification) and length of hospital stay. Furthermore,  
4  
5 234 data on performance status (e.g. WHO performance status, ASA score) are collected.  
6

7 235  
8  
9 236 Data on clinical outcomes, i.e. recurrence and progression with dates of diagnosis, stage and  
10  
11 237 Fuhrman grade, is also collected.  
12

13  
14 238

### 15 239 *Power calculation and data analyses*

17 240 The power calculation of this study is based on our initial research question, i.e. the cross-  
18  
19 241 sectional association of patient and tumour characteristics, lifestyle habits, and circulating  
20  
21 242 concentrations of biomarkers with body composition features. With 369 patients, we will have  
22  
23 243 sufficient power ( $\geq 80\%$ ) to detect a multiple correlation coefficient of 0.30 (Cohen's  $f^2=0.10$  for  
24  
25 244 patient and tumour characteristics, dietary and lifestyle habits, and circulating concentrations  
26  
27 245 of biomarkers with body composition features), corresponding to a small ( $f^2=0.02$ ) to medium  
28  
29 246 ( $f^2=0.15$ ) effect size (46). This power calculation is based on 276 stage I-III patients (assuming  
30  
31 247 75% available and analyzable CT scans), 19 predictor variables, and 3 body composition  
32  
33 248 features as outcome variables (cross-sectional area and radiodensity of SM and cross-  
34  
35 249 sectional area of VAT). For the power calculation, we correct for multiplicity (3 body  
36  
37 250 composition features) by using the Bonferroni corrected alpha of 0.05/3.  
38

39  
40 251 Multiple linear regression analyses will be used to estimate the cross-sectional association of  
41  
42 252 patient and tumor characteristics, lifestyle habits, and biomarkers with body composition  
43  
44 253 features. Longitudinal associations of body composition features, lifestyle habits and  
45  
46 254 biomarkers with HRQoL will be assessed using linear mixed models. Logistic regression and  
47  
48 255 Cox proportional hazard analyses will be used to estimate the association of body composition  
49  
50 256 features, lifestyle habits and biomarkers with other clinical outcomes.  
51

52  
53 257

## 54 258 **FINDINGS TO DATE**

### 55 259 **Characteristics of study participants**

56  
57 260

1  
2  
3 261 **Figure 2** Flowchart of the ReLife study

4  
5 262

6  
7 263 From January 2018 to June 2021, 882 patients diagnosed with stage I-III RCC were invited to  
8  
9 264 participate. Recruitment was paused between 16 March and 18 May 2020 due to Covid-19  
10  
11 265 measures. In total, 837 patients were eligible and 369 patients agreed to participate and filled  
12  
13 266 out the first or second questionnaires (response rate 44%) (**Figure 2**). The number of  
14  
15 267 questionnaires, ActivPal measurements and blood samples available at T3mo are also shown  
16  
17 268 in **Figure 2**. The collection of CT scans and data at T1y and T2y are is still ongoing.

18  
19 269 In **Table 2**, the baseline characteristics of the cohort are presented. The mean age of patients  
20  
21 270 was  $62.5 \pm 9.0$  years and 70% was male. Most patients had stage I (65%) and Fuhrman grade  
22  
23 271 2 (50%) disease. The majority has been treated with radical (57%) or partial nephrectomy  
24  
25 272 (42%). Participants were comparable to non-participants with respect to age, sex, tumour  
26  
27 273 stage, tumour grade and type of treatment. The majority of participants was overweight (44%)  
28  
29 274 or obese (25%) and was a former smoker (50%).  
30  
31  
32  
33  
34  
35  
36  
37  
38  
39  
40  
41  
42  
43  
44  
45  
46  
47  
48  
49  
50  
51  
52  
53  
54  
55  
56  
57  
58  
59  
60

275 **Table 2.** Baseline characteristics of 369 patients with renal cell cancer included in the ReLife  
276 study

|                                                      |                  |
|------------------------------------------------------|------------------|
| Age at diagnosis (y), mean $\pm$ SD                  | 62.5 $\pm$ 9.0   |
| Sex, n (%)                                           |                  |
| Male                                                 | 258 (70)         |
| Female                                               | 111 (30)         |
| Educational level, n (%) <sup>a</sup>                |                  |
| Low                                                  | 151 (41)         |
| Medium                                               | 116 (31)         |
| High                                                 | 98 (27)          |
| Missing                                              | 4 (1)            |
| BMI (kg/m <sup>2</sup> ), mean $\pm$ SD              | 27.5 $\pm$ 4.6   |
| BMI (kg/m <sup>2</sup> ), n (%)                      |                  |
| Underweight ( $\leq$ 18.5)                           | 1 (0.3)          |
| Normal weight (18.5-25)                              | 111 (30)         |
| Overweight (25- $\leq$ 30)                           | 163 (44)         |
| Obese ( $>$ 30)                                      | 91 (25)          |
| Missing                                              | 3 (1)            |
| Waist circumference (cm), mean $\pm$ SD <sup>b</sup> | 101.2 $\pm$ 12.1 |
| Hip circumference (cm), mean $\pm$ SD <sup>b</sup>   | 102.0 $\pm$ 9.5  |
| Cigarette smoking status, n (%)                      |                  |
| Current                                              | 43 (12)          |
| Former                                               | 186 (50)         |
| Never                                                | 137 (37)         |
| Missing                                              | 3 (1)            |
| Tumor stage, n (%)                                   |                  |
| I                                                    | 239 (65)         |
| II                                                   | 55 (15)          |
| III                                                  | 75 (20)          |
| Fuhrman grade, n (%)                                 |                  |
| 1                                                    | 49 (13)          |
| 2                                                    | 185 (50)         |
| 3                                                    | 67 (18)          |
| 4                                                    | 23 (6)           |
| unknown                                              | 45 (12)          |
| Treatment, n (%)                                     |                  |
| Radical nephrectomy                                  | 210 (57)         |
| Partial nephrectomy                                  | 153 (42)         |
| Ablation <sup>c</sup>                                | 6 (2)            |
| Comorbidities, n (%)                                 |                  |
| 0                                                    | 54 (15)          |
| 1                                                    | 85 (23)          |
| $\geq$ 2                                             | 227 (62)         |
| Missing                                              | 3 (1)            |

277 <sup>a</sup> Low (primary, secondary, vocational education), medium (intermediate vocational education, higher general  
278 secondary education, pre-university education), high (university of vocational education, university)

279 <sup>b</sup> Values for 8 participants were missing

280 <sup>c</sup> Other treatment consisted of cryoablation (n=2), radiofrequency ablation (n=3) and microwave ablation (n=1)

1  
2  
3 281 **Abbreviations**  
4

5 282 BMI, body mass index; cTNM: clinical TNM stage; DNTP: Dutch National Tissuebank Portal;  
6  
7 283 IKNL: Netherlands Comprehensive Cancer Organisation; IMAT: intramuscular adipose tissue;  
8  
9 284 NCR: Netherlands Cancer Registry; PALGA foundation: Pathological Anatomical National  
10  
11 285 Automate Archive; pTNM: post-surgical TNM stage; RCC: renal cell cancer; SAT:  
12  
13 286 subcutaneous adipose tissue; SD: standard deviation; SM: skeletal muscle; SMD: skeletal  
14  
15 287 muscle density; SMI: skeletal muscle index; SQUASH: Short Questionnaire to Assess Health;  
16  
17 288 TAT: total adipose tissue; T1y: 1 year after treatment; T2y: 2 years after treatment; T3mo:  
18  
19 289 three months after treatment; VAT: visceral adipose tissue.  
20  
21  
22  
23  
24  
25  
26  
27  
28  
29  
30  
31  
32  
33  
34  
35  
36  
37  
38  
39  
40  
41  
42  
43  
44  
45  
46  
47  
48  
49  
50  
51  
52  
53  
54  
55  
56  
57  
58  
59  
60

1  
2  
3 290 **DECLARATIONS**

4  
5 291 **Acknowledgements**

6  
7 292 We are grateful to all the patients who participate in this study and we thank the following  
8  
9 293 hospitals for their involvement in recruitment for the ReLife study: Amphia Ziekenhuis,  
10  
11 294 Breda/Oosterhout (D.K.E. van der Schoot); Ziekenhuis Bernhoven, Uden (A.Q.H.J. Niemer);  
12  
13 295 Canisius-Wilhelmina Ziekenhuis, Nijmegen (D.M. Somford); Catharina Ziekenhuis,  
14  
15 296 Eindhoven (W.A. Scheepens); Elisabeth-TweeSteden Ziekenhuis, Tilburg/Waalwijk (P.J.M.  
16  
17 297 Kil, B.P. Wijsman); Elkerliek Ziekenhuis, Helmond (P.J. van Hest); Gelre Ziekenhuizen,  
18  
19 298 Apeldoorn/Zutphen (D.M. Bochove-Overgaauw); Jeroen Bosch Ziekenhuis, 's-  
20  
21 299 Hertogenbosch (S. van der Meer); Maasziekenhuis Pantein, Boxmeer (E. van Boven);  
22  
23 300 Maxima Medisch Centrum, Veldhoven/Eindhoven (L.M.C.L. Fossion, K. de Laet); Meander  
24  
25 301 Medisch Centrum, Amersfoort (F.S. van Rey); Radboudumc, Nijmegen; Rijnstate,  
26  
27 302 Arnhem/Velp/Zevenaar (G.A.H.J Smits); Slingeland Ziekenhuis, Doetinchem (A.D.H.  
28  
29 303 Geboers); St. Jansdal Ziekenhuis, Harderwijk (W.J. Kniestedt); UMC Utrecht (R.P. Meijer);  
30  
31 304 Ziekenhuis Gelderse Vallei, Ede (M.D.H. Kortleve); Ziekenhuisgroep Twente,  
32  
33 305 Almelo/Hengelo (S. Stomps). In addition, we thank Ms. Ivy Beeren, Ms. Monique  
34  
35 306 Eijgenberger, Ms. Jolanda van Haren and Ms. Ursula Oldenhof for their assistance in data  
36  
37 307 collection. We also thank the data managers and research assistants of the Netherlands  
38  
39 308 Cancer Registry held by the Netherlands Comprehensive Cancer Organisation (IKNL) for  
40  
41 309 inviting patients and collecting the clinical data.  
42  
43  
44

45 310

46  
47 311 **Authors' contributions**

48  
49 312 AV, EK, JPM, JSFM, KKHA, and LALMK contributed to the conception and design of the  
50  
51 313 study. AV provides overall study management and coordinates the project. JSFM contributed  
52  
53 314 to data collection. AV and JSFM drafted the manuscript. All authors have critically read and  
54  
55 315 revised the manuscript. All authors approved the final version of the manuscript.  
56  
57

58 316

59  
60 317 **Funding**

1  
2  
3 318 This project is funded by the Dutch Cancer Society (KUN 2015-7948). Sponsors were not  
4  
5 319 involved in the study design nor will they be in the collection, analysis, and interpretation of  
6  
7 320 data, or in the publications that will result from this study.  
8

9 321

### 11 322 **Competing interests**

13 323 The authors declare that they have no competing interests.  
14  
15 324

### 17 325 **Ethics approval and consent to participate**

19 326 The study protocol has been approved on March 2, 2017 by the Committee for Human  
20  
21 327 Research region Arnhem-Nijmegen (CMO 2016-3078). Patients who agreed to participate in  
22  
23 328 the study provided a written informed consent.  
24  
25 329

### 28 330 **Consent for publication**

30 331 Not applicable.  
31  
32 332

### 34 333 **Availability of data and material**

36 334 Data and material are not yet available since data collection has not been completed yet.  
37  
38 335 After completion of data collection, data will be made available by the corresponding author  
39  
40 336 upon reasonable request.  
41  
42 337

## 338 REFERENCES

1. Capitanio U, Bensalah K, Bex A, Boorjian SA, Bray F, Coleman J, Gore JL, Sun M, Wood C, Russo P. Epidemiology of Renal Cell Carcinoma. *Eur Urol* 2019;75:74-84.
2. van de Schans SA, Aben KK, Mulders PF, Haanen JB, van Herpen C, Verhoeven RH, Karim-Kos HE, Oosterwijk E, Kiemeny LA. Modest improvement in 20 years of kidney cancer care in the Netherlands. *Eur J Cancer* 2012;48:1822-30.
3. Sung H, Ferlay J, Siegel RL, Laversanne M, Soerjomataram I, Jemal A, Bray F. Global Cancer Statistics 2020: GLOBOCAN Estimates of Incidence and Mortality Worldwide for 36 Cancers in 185 Countries. *CA Cancer J Clin* 2021;71:209-49.
4. Chow WH, Dong LM, Devesa SS. Epidemiology and risk factors for kidney cancer. *Nat Rev Urol* 2010;7:245-57.
5. Ljungberg B, Albiges L, Abu-Ghanem Y, Bedke J, Capitanio U, Dabestani S, Fernandez-Pello S, Giles RH, Hofmann F, Hora M, Klatte T, Kuusk T, Lam TB, Marconi L, Powles T, Tahbaz R, Volpe A, Bex A. European Association of Urology Guidelines on Renal Cell Carcinoma: The 2022 Update. *Eur Urol* 2022.
6. Dabestani S, Marconi L, Kuusk T, Bex A. Follow-up after curative treatment of localised renal cell carcinoma. *World J Urol* 2018;36:1953-9.
7. Volpe A, Patard JJ. Prognostic factors in renal cell carcinoma. *World J Urol* 2010;28:319-27.
8. Laguna MP, Algaba F, Cadeddu J, Clayman R, Gill I, Gueglio G, Hohenfellner M, Joyce A, Landman J, Lee B, van Poppel H, Clinical Research Office of the Endourological Society Renal Mass S. Current patterns of presentation and treatment of renal masses: a clinical research office of the endourological society prospective study. *J Endourol* 2014;28:861-70.
9. Renehan AG, Tyson M, Egger M, Heller RF, Zwahlen M. Body-mass index and incidence of cancer: a systematic review and meta-analysis of prospective observational studies. *Lancet* 2008;371:569-78.
10. Parkin DM, Boyd L. 8. Cancers attributable to overweight and obesity in the UK in 2010. *Br J Cancer* 2011;105 Suppl 2:S34-7.
11. Lanting CI, de Vroome EM, Elias SG, van den Brandt PA, van Leeuwen FE, Kampman E, Kiemeny LA, Peeters PH, de Vries E, Bausch-Goldbohm RA. [Contribution of lifestyle factors to cancer: secondary analysis of Dutch data over 2010 and a projection for 2020]. *Ned Tijdschr Geneesk* 2014;159:A8085.
12. Choi Y, Park B, Jeong BC, Seo SI, Jeon SS, Choi HY, Adami HO, Lee JE, Lee HM. Body mass index and survival in patients with renal cell carcinoma: a clinical-based cohort and meta-analysis. *Int J Cancer* 2013;132:625-34.
13. Kim LH, Doan P, He Y, Lau HM, Pleass H, Patel MI. A Systematic Review and Meta-Analysis of the Significance of Body Mass Index on Kidney Cancer Outcomes. *J Urol* 2021;205:346-55.
14. Mourtzakis M, Prado CM, Lieffers JR, Reiman T, McCargar LJ, Baracos VE. A practical and precise approach to quantification of body composition in cancer patients using computed tomography images acquired during routine care. *Appl Physiol Nutr Metab* 2008;33:997-1006.
15. Shen W, Punyanitya M, Wang Z, Gallagher D, St-Onge MP, Albu J, Heymsfield SB, Heshka S. Total body skeletal muscle and adipose tissue volumes: estimation from a single abdominal cross-sectional image. *J Appl Physiol* (1985) 2004;97:2333-8.
16. Shen W, Punyanitya M, Wang Z, Gallagher D, St-Onge MP, Albu J, Heymsfield SB, Heshka S. Visceral adipose tissue: relations between single-slice areas and total volume. *Am J Clin Nutr* 2004;80:271-8.
17. Weerink LBM, van der Hoorn A, van Leeuwen BL, de Bock GH. Low skeletal muscle mass and postoperative morbidity in surgical oncology: a systematic review and meta-analysis. *J Cachexia Sarcopenia Muscle* 2020;11:636-49.
18. Xiao J, Mazurak VC, Olobatuyi TA, Caan BJ, Prado CM. Visceral adiposity and cancer survival: a review of imaging studies. *Eur J Cancer Care (Engl)* 2018;27:e12611.

- 1  
2  
3 389 19. Shachar SS, Williams GR, Muss HB, Nishijima TF. Prognostic value of sarcopenia in adults with  
4 390 solid tumours: A meta-analysis and systematic review. *Eur J Cancer* 2016;57:58-67.  
5 391 20. Aleixo GFP, Shachar SS, Nyrop KA, Muss HB, Malpica L, Williams GR. Myosteatosis and  
6 392 prognosis in cancer: Systematic review and meta-analysis. *Crit Rev Oncol Hematol*  
7 393 2020;145:102839.  
8 394 21. Vrieling A, Kampman E, Knijnenburg NC, Mulders PF, Sedelaar JPM, Baracos VE, Kiemeny LA.  
9 395 Body Composition in Relation to Clinical Outcomes in Renal Cell Cancer: A Systematic Review  
10 396 and Meta-analysis. *Eur Urol Focus* 2018;4:420-34.  
11 397 22. Psutka SP, Boorjian SA, Moynagh MR, Schmit GD, Costello BA, Thompson RH, Stewart-Merrill  
12 398 SB, Lohse CM, Cheville JC, Leibovich BC, Tollefson MK. Decreased Skeletal Muscle Mass is  
13 399 Associated with an Increased Risk of Mortality Following Radical Nephrectomy for Localized  
14 400 Renal Cell Cancer. *J Urol* 2015;195:270-6.  
15 401 23. Kaneko G, Miyajima A, Yuge K, Yazawa S, Mizuno R, Kikuchi E, Jinzaki M, Oya M. Visceral  
16 402 obesity is associated with better recurrence-free survival after curative surgery for Japanese  
17 403 patients with localized clear cell renal cell carcinoma. *Jpn J Clin Oncol* 2015;45:210-6.  
18 404 24. Naya Y, Zenbutsu S, Araki K, Nakamura K, Kobayashi M, Kamijima S, Imamoto T, Nihei N,  
19 405 Suzuki H, Ichikawa T, Igarashi T. Influence of visceral obesity on oncologic outcome in  
20 406 patients with renal cell carcinoma. *Urol Int* 2010;85:30-6.  
21 407 25. Lee HW, Jeong BC, Seo SI, Jeon SS, Lee HM, Choi HY, Jeon HG. Prognostic significance of  
22 408 visceral obesity in patients with advanced renal cell carcinoma undergoing nephrectomy. *Int*  
23 409 *J Urol* 2015;22:455-61.  
24 410 26. Bredella MA. Sex Differences in Body Composition. *Adv Exp Med Biol* 2017;1043:9-27.  
25 411 27. Wulan SN, Westerterp KR, Plasqui G. Ethnic differences in body composition and the  
26 412 associated metabolic profile: a comparative study between Asians and Caucasians. *Maturitas*  
27 413 2010;65:315-9.  
28 414 28. Keehn A, Srivastava A, Maiman R, Taylor J, DiVito J, Ghavamian R, Stern JM. The relationship  
29 415 between visceral obesity and the clinicopathologic features of patients with small renal  
30 416 masses. *J Endourol* 2015;29:372-6.  
31 417 29. Guo H, Zhao W, Wang A, Li M, Ma H, Wang F, Wang Q, Ba X. The value of sex-specific  
32 418 abdominal visceral fat as measured via CT as a predictor of clear renal cell carcinoma T stage.  
33 419 *Adipocyte* 2021;10:285-92.  
34 420 30. Cumberbatch MG, Rota M, Catto JW, La Vecchia C. The Role of Tobacco Smoke in Bladder  
35 421 and Kidney Carcinogenesis: A Comparison of Exposures and Meta-analysis of Incidence and  
36 422 Mortality Risks. *Eur Urol* 2016;70:458-66.  
37 423 31. Al-Bayati O, Hasan A, Pruthi D, Kaushik D, Liss MA. Systematic review of modifiable risk  
38 424 factors for kidney cancer. *Urol Oncol* 2019;37:359-71.  
39 425 32. Pinthus JH, Kleinmann N, Tisdale B, Chatterjee S, Lu JP, Gillis A, Hamlet T, Singh G, Farrokhyar  
40 426 F, Kapoor A. Lower plasma adiponectin levels are associated with larger tumor size and  
41 427 metastasis in clear-cell carcinoma of the kidney. *Eur Urol* 2008;54:866-73.  
42 428 33. Horiguchi A, Ito K, Sumitomo M, Kimura F, Asano T, Hayakawa M. Decreased serum  
43 429 adiponectin levels in patients with metastatic renal cell carcinoma. *Jpn J Clin Oncol*  
44 430 2008;38:106-11.  
45 431 34. Horiguchi A, Sumitomo M, Asakuma J, Asano T, Zheng R, Asano T, Nanus DM, Hayakawa M.  
46 432 Increased serum leptin levels and over expression of leptin receptors are associated with the  
47 433 invasion and progression of renal cell carcinoma. *J Urol* 2006;176:1631-5.  
48 434 35. Steffens S, Kohler A, Rudolph R, Eggers H, Seidel C, Janssen M, Wegener G, Schrader M,  
49 435 Kuczyk MA, Schrader AJ. Validation of CRP as prognostic marker for renal cell carcinoma in a  
50 436 large series of patients. *BMC Cancer* 2012;12:399.  
51 437 36. de Martino M, Leitner CV, Hofbauer SL, Lucca I, Haitel A, Shariat SF, Klatte T. Serum  
52 438 Adiponectin Predicts Cancer-specific Survival of Patients with Renal Cell Carcinoma. *Eur Urol*  
53 439 *Focus* 2016;2:197-203.  
54  
55  
56  
57  
58  
59  
60

- 1  
2  
3 440 37. Wendel-Vos GW, Schuit AJ, Saris WH, Kromhout D. Reproducibility and relative validity of the  
4 441 short questionnaire to assess health-enhancing physical activity. *Journal of clinical*  
5 442 *epidemiology* 2003;56:1163-9.  
6 443 38. de Hollander EL, Zwart L, de Vries SI, Wendel-Vos W. The SQUASH was a more valid tool than  
7 444 the OBiN for categorizing adults according to the Dutch physical activity and the combined  
8 445 guideline. *Journal of clinical epidemiology* 2012;65:73-81.  
9 446 39. Wagenmakers R, van den Akker-Scheek I, Groothoff JW, Zijlstra W, Bulstra SK, Kootstra JW,  
10 447 Wendel-Vos GW, van Raaij JJ, Stevens M. Reliability and validity of the short questionnaire to  
11 448 assess health-enhancing physical activity (SQUASH) in patients after total hip arthroplasty.  
12 449 *BMC Musculoskeletal Disorders* 2008;9:141.  
13 450 40. de Vries JH, de Groot LC, van Staveren WA. Dietary assessment in elderly people: experiences  
14 451 gained from studies in the Netherlands. *Eur J Clin Nutr* 2009;63 Suppl 1:S69-74.  
15 452 41. Siebelink E, Geelen A, de Vries JH. Self-reported energy intake by FFQ compared with actual  
16 453 energy intake to maintain body weight in 516 adults. *Br J Nutr* 2011;106:274-81.  
17 454 42. Streppel MT, de Vries JH, Meijboom S, Beekman M, de Craen AJ, Slagboom PE, Feskens EJ.  
18 455 Relative validity of the food frequency questionnaire used to assess dietary intake in the  
19 456 Leiden Longevity Study. *Nutr J* 2013;12:75.  
20 457 43. NEVO. NEVO-tabel: Dutch food composition database. Den Haag: RIVM/Voedingscentrum,  
21 458 2011.  
22 459 44. Aaronson NK, Ahmedzai S, Bergman B, Bullinger M, Cull A, Duez NJ, Filiberti A, Flechtner H,  
23 460 Fleishman SB, de Haes JC. The European Organization for Research and Treatment of Cancer  
24 461 QLQ-C30: a quality-of-life instrument for use in international clinical trials in oncology. *JNCI:*  
25 462 *Journal of the National Cancer Institute* 1993;85:365-76.  
26 463 45. Godfrey A, Culhane KM, Lyons GM. Comparison of the performance of the activPAL  
27 464 Professional physical activity logger to a discrete accelerometer-based activity monitor. *Med*  
28 465 *Eng Phys* 2007;29:930-4.  
29 466 46. Faul F, Erdfelder E, Buchner A, Lang AG. Statistical power analyses using G\*Power 3.1: tests  
30 467 for correlation and regression analyses. *Behav Res Methods* 2009;41:1149-60.  
31  
32  
33  
34  
35 468  
36  
37  
38  
39  
40  
41  
42  
43  
44  
45  
46  
47  
48  
49  
50  
51  
52  
53  
54  
55  
56  
57  
58  
59  
60

1  
2  
3 469 **Figure 1.** Timeline and study design of the ReLife study  
4

5 470 **Figure 2.** Flow chart of the ReLife study  
6  
7  
8  
9  
10  
11  
12  
13  
14  
15  
16  
17  
18  
19  
20  
21  
22  
23  
24  
25  
26  
27  
28  
29  
30  
31  
32  
33  
34  
35  
36  
37  
38  
39  
40  
41  
42  
43  
44  
45  
46  
47  
48  
49  
50  
51  
52  
53  
54  
55  
56  
57  
58  
59  
60

For peer review only

1  
2  
3  
4  
5  
6  
7  
8  
9  
10  
11  
12  
13  
14  
15  
16  
17  
18  
19  
20  
21  
22  
23  
24  
25  
26  
27  
28  
29  
30  
31  
32  
33  
34  
35  
36  
37  
38  
39  
40  
41  
42  
43  
44  
45  
46  
47  
48  
49  
50  
51  
52  
53  
54  
55  
56  
57  
58  
59  
60

471

For peer review only

## Overview ReLife study



# RE LIFE



# BMJ Open

## Cohort profile: The ReLife (Renal cell cancer: Lifestyle, prognosis, and quality of life) study in the Netherlands

|                                 |                                                                                                                                                                                                                                                                                                                                                                                                                                                                                      |
|---------------------------------|--------------------------------------------------------------------------------------------------------------------------------------------------------------------------------------------------------------------------------------------------------------------------------------------------------------------------------------------------------------------------------------------------------------------------------------------------------------------------------------|
| Journal:                        | <i>BMJ Open</i>                                                                                                                                                                                                                                                                                                                                                                                                                                                                      |
| Manuscript ID                   | bmjopen-2022-066909.R1                                                                                                                                                                                                                                                                                                                                                                                                                                                               |
| Article Type:                   | Cohort profile                                                                                                                                                                                                                                                                                                                                                                                                                                                                       |
| Date Submitted by the Author:   | 13-Feb-2023                                                                                                                                                                                                                                                                                                                                                                                                                                                                          |
| Complete List of Authors:       | Maurits, Jake; Radboudumc, Department for Health Evidence<br>Sedelaar, Michiel; Radboudumc, Department of Urology<br>Aben, Katja; Netherlands Cancer Registry; Radboudumc, Department for Health Evidence<br>Kampman, Ellen; Wageningen University & Research, Division of Human Nutrition and Health; Radboudumc, Department for Health Evidence<br>Kiemeneij, Lambertus; Radboudumc, Department for Health Evidence<br>Vrieling, Alina; Radboudumc, Department for Health Evidence |
| <b>Primary Subject Heading</b>: | Epidemiology                                                                                                                                                                                                                                                                                                                                                                                                                                                                         |
| Secondary Subject Heading:      | Oncology                                                                                                                                                                                                                                                                                                                                                                                                                                                                             |
| Keywords:                       | NUTRITION & DIETETICS, Kidney tumours < ONCOLOGY, Epidemiology < ONCOLOGY, PREVENTIVE MEDICINE                                                                                                                                                                                                                                                                                                                                                                                       |
|                                 |                                                                                                                                                                                                                                                                                                                                                                                                                                                                                      |

SCHOLARONE™  
Manuscripts



I, the Submitting Author has the right to grant and does grant on behalf of all authors of the Work (as defined in the below author licence), an exclusive licence and/or a non-exclusive licence for contributions from authors who are: i) UK Crown employees; ii) where BMJ has agreed a CC-BY licence shall apply, and/or iii) in accordance with the terms applicable for US Federal Government officers or employees acting as part of their official duties; on a worldwide, perpetual, irrevocable, royalty-free basis to BMJ Publishing Group Ltd ("BMJ") its licensees and where the relevant Journal is co-owned by BMJ to the co-owners of the Journal, to publish the Work in this journal and any other BMJ products and to exploit all rights, as set out in our [licence](#).

The Submitting Author accepts and understands that any supply made under these terms is made by BMJ to the Submitting Author unless you are acting as an employee on behalf of your employer or a postgraduate student of an affiliated institution which is paying any applicable article publishing charge ("APC") for Open Access articles. Where the Submitting Author wishes to make the Work available on an Open Access basis (and intends to pay the relevant APC), the terms of reuse of such Open Access shall be governed by a Creative Commons licence – details of these licences and which [Creative Commons](#) licence will apply to this Work are set out in our licence referred to above.

Other than as permitted in any relevant BMJ Author's Self Archiving Policies, I confirm this Work has not been accepted for publication elsewhere, is not being considered for publication elsewhere and does not duplicate material already published. I confirm all authors consent to publication of this Work and authorise the granting of this licence.

1  
2  
3 1 **Cohort profile: The ReLife (Renal cell cancer: Lifestyle, prognosis, and quality of life)**  
4  
5 2 **study in the Netherlands**  
6

7 3  
8  
9 4 Jake. S.F. Maurits<sup>a</sup>, J.P. Michiel Sedelaar<sup>b</sup>, Katja K.H. Aben<sup>a,c</sup>, Ellen Kampman<sup>a,d</sup>, Lambertus  
10  
11 5 A.L.M. Kiemeney<sup>a,b</sup>, Alina Vrieling<sup>a</sup>  
12

13 6  
14  
15 7 <sup>a</sup> Department for Health Evidence, Radboud University Medical Center, Nijmegen, The  
16  
17 8 Netherlands  
18

19  
20  
21 9 <sup>b</sup> Department of Urology, Radboud University Medical Center, Nijmegen, The Netherlands  
22

23  
24 10 <sup>c</sup> Department of Research and Development, Netherlands Comprehensive Cancer  
25  
26 11 Organisation, Utrecht, The Netherlands  
27

28  
29 12 <sup>d</sup> Division of Human Nutrition and Health, Wageningen University, Wageningen, The  
30  
31 13 Netherlands  
32

33  
34 14  
35  
36 15 **Corresponding author:** Dr. Alina Vrieling, Radboud university medical center, Department  
37  
38 16 for Health Evidence (Mailbox 133), P.O. Box 9101, 6500 HB Nijmegen, The Netherlands.  
39  
40 17 Tel: +31 24 3616944, Fax: +31 24 3613505, e-mail: Alina.Vrieling@radboudumc.nl  
41  
42 18

43  
44  
45 19 **Keywords:** renal cell cancer, diet, lifestyle, body composition, biomarkers, quality of life,  
46  
47 20 cohort profile  
48  
49

50  
51 21  
52  
53 22 **Word count:** 2349  
54  
55  
56  
57  
58  
59  
60

**ABSTRACT****Purpose:**

The ReLife study is set up to obtain insight into the association of patient and tumour characteristics, lifestyle habits and circulating biomarkers with body composition features in patients with localized renal cell cancer (RCC). Further, it aims to assess the association of body composition features, lifestyle habits and circulating biomarkers with clinical outcomes including health-related quality of life.

**Participants:**

The ReLife study is a multicenter prospective cohort study involving 368 patients with newly diagnosed stage I-III RCC recruited from January 2018-June 2021 from 18 hospitals in the Netherlands. At 3 months, 1 and 2 years after treatment, participants fill out a general questionnaire and questionnaires about their lifestyle habits (e.g. diet, physical activity, smoking, alcohol consumption), medical history, and health-related quality of life. At all 3 time points, patients wear an accelerometer and have blood samples taken. CT scans for body composition analysis are being collected. Permission is asked for collection of tumour samples. Information about disease characteristics, treatment of the primary tumour and clinical outcomes is being collected from medical records by the Netherlands Cancer Registry.

**Findings to date:**

A total of 836 invited patients were eligible and 368 patients were willing to participate and were included (response rate 44%). The mean age of patients was  $62.5 \pm 9.0$  years and 70% was male. The majority had stage I (65%) disease and were treated with radical nephrectomy (57%). Data collection at 3 months and 1 years after treatment has been finalized.

**Future plans:**

Data collection at 2 years after treatment is expected to be finalized in June 2023 and longitudinal clinical data will continue to be collected. Results of studies based on this cohort are important to develop personalized evidence-based lifestyle advice for patients with localized RCC to enable them to get more control over their disease course.

1  
2  
3 **51 STRENGTHS AND LIMITATIONS**  
4

5 52 - The ReLife study is the first population-based prospective cohort study on lifestyle-related  
6  
7 53 factors and clinical outcomes in patients with localized RCC worldwide.

8  
9 54 - Comprehensive data on lifestyle-related factors and quality of life are collected at 3 months,  
10  
11 55 1 year and 2 years after treatment.

12  
13 56 - Both self-reported and objective data on body composition and physical activity are collected.

14  
15 57 - A limitation is that power for survival analyses is likely to be insufficient and future pooling  
16  
17 58 with other studies may be required.  
18  
19  
20  
21  
22  
23  
24  
25  
26  
27  
28  
29  
30  
31  
32  
33  
34  
35  
36  
37  
38  
39  
40  
41  
42  
43  
44  
45  
46  
47  
48  
49  
50  
51  
52  
53  
54  
55  
56  
57  
58  
59  
60

## 59 INTRODUCTION

60 Incidence rates of kidney cancer are increasing (1), which is partly explained by the increased  
61 use of diagnostic imaging but also by the increased prevalence of obesity (2). The worldwide  
62 number of new kidney cancer cases was estimated to be over 430,000 in 2020 (3). In the  
63 Netherlands, over 2,700 new cases with kidney cancer were diagnosed in 2019 (4). More than  
64 90% of kidney cancers are renal cell cancers (RCC) (5). Of all RCC patients, about 70-80%  
65 are diagnosed with localised disease (stage I-III) and about 20-30% with advanced or  
66 metastatic disease (stage IV) (2). Almost all RCC patients with localised disease are treated  
67 with partial or radical nephrectomy (6). Despite this treatment, 20-30% of patients with localised  
68 disease will have a relapse or develop metastatic RCC during follow-up (7). Five-year relative  
69 survival rates are approximately 90% (stage I and II), 65% (stage III), and 12% (stage IV) (2).

70 Classical prognostic factors for localised RCC include anatomical (e.g., TNM  
71 classification), histological (e.g., tumour grade, histological subtype), clinical (e.g.,  
72 performance status, certain blood values), and molecular features (e.g., *BAP1* and *PBRM1*  
73 mutations), but the combination of these features does not have sufficient predictive accuracy  
74 (8). In order to provide tailored treatment and follow-up care, the identification of additional  
75 prognostic factors that predict the expected clinical course in each individual patient is subject  
76 of active scientific research.

77 Nowadays, more than 60% of RCC patients are overweight or obese at diagnosis (body  
78 mass index (BMI)  $\geq 25$  kg/m<sup>2</sup>) (9). A meta-analysis of prospective observational studies showed  
79 a 24% increased risk of RCC for men and a 34% increased risk for women per 5 kg/m<sup>2</sup> increase  
80 in BMI (10). It is estimated that about 17% and 24% of RCC cases are attributable to  
81 overweight in the Netherlands and in the UK, respectively (11, 12). Paradoxically, meta-  
82 analyses on BMI and survival suggest that RCC patients who were overweight or obese at  
83 diagnosis have a significantly better overall, cancer-specific, and recurrence-free survival  
84 compared with normal weight patients (13, 14). The higher risk but better prognosis with higher  
85 BMI is counterintuitive. Possibly, body composition explains part of this paradox.

1  
2  
3 86 Body composition refers to the content of fat, lean tissue and bone in the human body.  
4  
5 87 The amount and distribution of these tissues may be independent of BMI; subjects with similar  
6  
7 88 BMI may have different amounts of visceral adipose tissue (VAT), subcutaneous adipose  
8  
9 89 tissue (SAT), skeletal muscle (SM), and intermuscular adipose tissue (IMAT). Cross-sectional  
10  
11 90 areas and mean radiodensity of these tissues can be assessed by analysis of computed  
12  
13 91 tomography (CT) scans at the level of the third lumbar vertebra (L3), using established  
14  
15 92 Hounsfield Unit (HU) thresholds for each tissue. Cross-sectional total adipose tissue (TAT) and  
16  
17 93 SM areas at L3 are linearly related to body TAT and SM mass (15-17).

18  
19  
20 94 High VAT mass, low SM index (SMI (SM/height<sup>2</sup>)), and low SM radiodensity (SMD) have  
21  
22 95 been associated with adverse postoperative (18) and survival outcomes (19-21) in several  
23  
24 96 cancer types. In our meta-analysis, we showed that low SMI and low SMD are also associated  
25  
26 97 with increased overall mortality in patients with metastatic RCC (22). No meta-analysis could  
27  
28 98 be performed for localized RCC due to the limited number of studies and heterogeneity in body  
29  
30 99 composition parameters and outcomes (22). Studies also suggested an association of low vs.  
31  
32 100 high SMI with higher overall and cancer-specific mortality (23) and of lower SMD with higher  
33  
34 101 overall mortality (24). Other studies found that low vs. high VAT was associated with a higher  
35  
36 102 risk of recurrence (25), cancer-specific (26, 27), and overall mortality (24).

37  
38  
39 103 Body composition is known to differ by age, gender and race (28, 29). Studies on the  
40  
41 104 association of tumour characteristics with body composition features are inconsistent (30, 31)  
42  
43 105 and studies on the association of lifestyle habits and circulating biomarkers with body  
44  
45 106 composition parameters are not available in patients with RCC. Smoking has been associated  
46  
47 107 with increased RCC risk and RCC-specific mortality (32). Studies on dietary factors and  
48  
49 108 physical activity are inconsistent for RCC risk (33) and not available for clinical outcomes  
50  
51 109 including health-related quality of life (HRQoL). Some studies suggest that circulating  
52  
53 110 biomarkers (e.g. adiponectin, leptin and CRP) are associated with tumour size (34), invasion,  
54  
55 111 progression or metastasis (34-36) and survival (37, 38) in patients with RCC but results are  
56  
57 112 inconsistent.  
58  
59  
60

1  
2  
3 113 Thus, the association of patient and tumour characteristics, lifestyle habits and circulating  
4  
5 114 biomarkers with body composition features in patients with localized RCC needs to be clarified.  
6  
7 115 Further, there is a clear need to obtain more insight in body composition features and lifestyle  
8  
9 116 habits and their relation with clinical outcomes in patients with localized RCC. This information  
10  
11 117 is important to develop personalized evidence-based lifestyle advice for patients with localized  
12  
13 118 RCC to improve their clinical outcomes. Therefore, the objectives of this study are to evaluate  
14  
15 119 1) the association of patient and tumour characteristics, lifestyle habits, and circulating  
16  
17 120 biomarkers with body composition features, and 2) the association of body composition  
18  
19 121 features, lifestyle habits and circulating biomarkers with clinical outcomes, including  
20  
21 122 postoperative outcomes (e.g. complications, length of hospital stay), recurrence, progression,  
22  
23 123 survival, and HRQOL.  
24  
25  
26  
27  
28  
29  
30  
31  
32  
33  
34  
35  
36  
37  
38  
39  
40  
41  
42  
43  
44  
45  
46  
47  
48  
49  
50  
51  
52  
53  
54  
55  
56  
57  
58  
59  
60

## 124 **COHORT DESCRIPTION**

### 125 **Setting**

126 The ReLife study (**Renal cell cancer: Lifestyle, prognosis, and quality of Life**) is a prospective  
127 cohort study involving patients with newly diagnosed pathologically confirmed primary stage I-  
128 III RCC. Patients were recruited in 18 hospitals in the East, South, and Central parts of the  
129 Netherlands. Before the start of the study, permission was asked from all urologists of the  
130 participating hospitals to select and invite eligible patients from the Netherlands Cancer  
131 Registry (NCR), held by the Netherlands Comprehensive Cancer Organisation (IKNL). Once  
132 every 2 weeks, newly diagnosed patients were identified by IKNL personnel using notification  
133 lists of the Pathological Anatomical National Automate Archive (PALGA foundation) in the  
134 Netherlands. Approximately 10 weeks after treatment (surgery or ablation), patients were  
135 invited by IKNL personnel on behalf of their urologist to participate in this study (**Figure 1**).  
136 Patients who agreed to participate provided a written informed consent. Enrolment started in  
137 January 2018 and ended in June 2021 and collection of follow-up data is still ongoing.

139 **Figure 1** Timeline and study design of the ReLife study

### 141 **Patient and public involvement**

142 Four patient representatives were asked for feedback on the grant proposal and one patient  
143 representative was involved in the design and set-up phase of the study. Patients were not  
144 involved in the conduction of this research, but will be involved in the reporting and dissemination  
145 plans regarding information provision to patients. Results from the study will be communicated  
146 to participants and urologists from the participating hospitals through the study website  
147 ([www.radboudumc.nl/trials/relife](http://www.radboudumc.nl/trials/relife)), through newsletters and through the website of the patient  
148 society. Results will be submitted for publication in peer-reviewed journals and presented at  
149 relevant (inter)national conferences.

### 151 **Participants**

1  
2  
3 152 Eligible participants were between 18 and 75 years old who were newly diagnosed with a  
4  
5 153 histologically confirmed primary stage I-III RCC tumour and who underwent a (partial)  
6  
7 154 nephrectomy or ablation. Patients had to have sufficient command of the Dutch language since  
8  
9 155 all study materials and questionnaires were only available in Dutch. Patients with a previous  
10  
11 156 diagnosis of cancer in the five years before RCC diagnosis and those with a lymph node  
12  
13 157 metastasis or distant metastasis were not eligible.  
14  
15  
16 158

## 17 159 **Data collection and management**

### 18 160 *Questionnaires*

19  
20 161 Participants are asked to complete self-administered web-based or paper-and-pencil-based  
21  
22 162 questionnaires at 3 months (3mo), 1 year (1y) and 2 years (2y) after treatment (**Figure 1, Table**  
23  
24 163 **1**). Web-based questionnaires are collected using Castor EDC. Follow-up telephone calls are  
25  
26 164 made to non-responding participants and to respondents whose questionnaires have missing  
27  
28 165 items.  
29  
30

31  
32 166 The general questionnaire at 3mo contains questions on demographics (age, sex, ethnicity,  
33  
34 167 education, living situation, occupation, marital status) and personal and family history of  
35  
36 168 cancer. All questionnaires collect information about height, body weight, amount and  
37  
38 169 frequency of alcohol consumption during week- and weekend days, smoking habits,  
39  
40 170 comorbidities and the use of dietary supplements and medication. Information on smoking  
41  
42 171 habits is collected in detail, including age or date of starting and stopping smoking, number of  
43  
44 172 cigarettes smoked per day, and duration of smoking. Information about habitual physical  
45  
46 173 activity is collected by using the validated short questionnaire to assess health-enhancing  
47  
48 174 physical activity (SQUASH) (39). The SQUASH questionnaire assesses the average time,  
49  
50 175 i.e. number of days per week and hours and minutes per day, spent in commuting  
51  
52 176 activities, leisure time activities, household activities, and activities at work in a normal week  
53  
54 177 in the past month. At all three time points, patients are also asked to measure and report  
55  
56 178 their waist and hip circumference.  
57  
58  
59  
60

179 **Table 1.** Overview of data collection in ReLife at the three time points after treatment

|                                       | Measures                                                                                                                                                    | 3mo            | 1y             | 2y             |
|---------------------------------------|-------------------------------------------------------------------------------------------------------------------------------------------------------------|----------------|----------------|----------------|
| <b>Questionnaires</b>                 |                                                                                                                                                             |                |                |                |
| <i>Sociodemographic data</i>          | Date of birth, gender, country of birth of participant, father, mother, race, living situation, marital status, highest level of education, working history | X              |                |                |
| <i>Anthropometry</i>                  | Height at baseline, weight two years before diagnosis, weight loss 3-6 months before diagnosis, average weight during adult life                            | X              |                |                |
| <i>Lifestyle</i>                      | Current body weight, waist and hip circumference                                                                                                            | X              | X              | X              |
|                                       | Current and past smoking behaviour including dose and duration, alcohol consumption, (reasons for) changes in eating habits, mobility                       | X              | X              | X              |
|                                       | Short Questionnaire to Assess Health-enhancing physical activity (29)                                                                                       | X              | X              | X              |
| <i>Medical history</i>                | Frequency and amount of alcohol consumption during week and weekend days (32-34)                                                                            | X              | X              | X              |
|                                       | Changes in eating habits and reasons for/type of changes                                                                                                    |                | X              | X              |
|                                       | Previously diagnosed with cancer, family history of cancer                                                                                                  | X              |                |                |
| <i>Diet</i>                           | Comorbidities, medication use, dietary supplement use                                                                                                       | X              | X              | X              |
|                                       | 163- item Food Frequency Questionnaire                                                                                                                      | X              | X              | X              |
| <i>Health-related quality of life</i> | EORTC QLQ-C30 (44)                                                                                                                                          | X              | X              | X              |
| <b>Accelerometer</b>                  |                                                                                                                                                             |                |                |                |
|                                       | Habitual physical (in)activity, sedentary behavior                                                                                                          | X              | X              | X              |
| <b>Blood</b>                          |                                                                                                                                                             |                |                |                |
|                                       | EDTA whole blood for DNA isolation                                                                                                                          | X              |                |                |
|                                       | EDTA plasma, serum                                                                                                                                          | X              | X              | X              |
| <b>Tissue</b>                         |                                                                                                                                                             |                |                |                |
|                                       | Formalin-fixed paraffin-embedded tissue of the primary tumour                                                                                               | X <sup>a</sup> |                |                |
| <b>CT scan</b>                        |                                                                                                                                                             |                |                |                |
|                                       | Diagnostic CT scan                                                                                                                                          | X              |                |                |
|                                       | Follow-up CT scans                                                                                                                                          |                | X <sup>b</sup> | X <sup>b</sup> |
| <b>Clinical data</b>                  |                                                                                                                                                             |                |                |                |
|                                       | Disease characteristics, treatment                                                                                                                          | X              | X              | X              |
|                                       | Postoperative outcomes, recurrence and progression                                                                                                          | X              | X              | X              |

180 <sup>a</sup> To date only permission, no actual collection.; <sup>b</sup> Dependent on availability.

1  
2  
3 181 Habitual dietary intake is collected at all three time points using a 163-item validated and  
4  
5 182 reproducible self-administered food frequency questionnaire that was developed by  
6  
7 183 Wageningen University (40-42). The questionnaire contains questions about the frequency of  
8  
9 184 consumption of food products and the portion size during the previous month. Frequency and  
10  
11 185 portion size of consumed food products are multiplied to obtain their intake in grams per day.  
12  
13 186 Nutrient intake is calculated using the Dutch Food Composition Table (NEVO 2010) (43).

14  
15  
16 187  
17  
18 188 Health-related quality of life is assessed at all three time points with the validated EORTC QLQ-  
19  
20 189 C30 (44). The EORTC QLQ-C30 contains five function scales (physical, role, cognitive,  
21  
22 190 emotional and social functioning), three symptom scales (fatigue, nausea, pain and vomiting)  
23  
24 191 and six single items (dyspnea, insomnia, loss of appetite, constipation, diarrhea, and financial  
25  
26 192 impact), all scored from 1 (not at all) to 4 (very much)) and a global health status scale with  
27  
28 193 ranges from 1 (very poor) to 7 (excellent). All scores will be linearly transformed to a 0 to 100  
29  
30 194 scale.

31  
32  
33 195

#### 34 196 *Accelerometer*

35  
36 197 Habitual physical (in)activity is objectively measured at all three time points using the activPAL  
37  
38 198 physical activity monitor (PAL Technologies, Glasgow, UK). This accelerometer has shown to  
39  
40 199 be an accurate tool for measuring daily physical activity levels (45). Participants are asked to  
41  
42 200 wear the device continuously on the front right thigh for seven consecutive days. Data are  
43  
44 201 uploaded using the activPAL software.

45  
46  
47 202

#### 48 203 *Blood samples*

49  
50 204 Non-fasting blood samples are collected at all three time points. At 3mo, 10 ml EDTA  
51  
52 205 whole blood (for DNA isolation), 10 ml EDTA plasma and 8.5 ml serum is collected. At  
53  
54 206 the other two time points, 10 ml EDTA plasma and 8.5 ml serum is collected. All blood  
55  
56 207 samples are collected, processed and stored at -80°C locally in the participating hospitals  
57  
58 208 according to a standard protocol before transportation on dry ice to the Radboud Biobank.

1  
2  
3 209 The blood samples are stored in the Radboud Biobank at -80°C for future analyses of  
4  
5 210 genetic and other biomarkers. Analysis of adiponectin, leptin, and CRP by the Laboratory  
6  
7 211 for Experimental Internal Medicine of Radboudumc using commercially available  
8  
9 212 enzyme-linked immunosorbent assays is planned.  
10

11 213

#### 13 214 *Tumour samples*

15 215 From all patients, permission for collection of tumour specimens is requested for future  
16  
17 216 assessment of tumour characteristics (e.g. tumour necrosis) and acquired genetic alterations  
18  
19 217 (e.g. in the *BAP1* or *PBRM1* genes) (6). Formalin-fixed paraffin-embedded tumour blocks can  
20  
21 218 be identified by using the PALGA foundation and retrieved using the Dutch National  
22  
23 219 Tissuebank Portal (DNTP) from the local pathology laboratories.  
24

25 220

#### 27 221 *CT scans*

28  
29 222 CT scans are retrieved from medical records of all patients for the assessment of body  
30  
31 223 composition. Diagnostic CT scans are available from almost all RCC patients as they are used  
32  
33 224 for diagnosis and staging of the disease. If available, follow-up CT scans are collected as well.  
34  
35 225 From these CT scans, cross-sectional areas (cm<sup>2</sup>) and mean radiodensity of SM, VAT, SAT  
36  
37 226 and IMAT are quantified at the landmark level of the third lumbar vertebra (L3).  
38

39 227

#### 41 228 *Clinical data*

42  
43 229 Information about disease characteristics and treatment for the initial tumour and subsequent  
44  
45 230 recurrences is collected from the medical records by data managers of the Netherlands Cancer  
46  
47 231 Registry. Information about tumour characteristics includes incidence date, clinical (cTNM) and  
48  
49 232 post-surgical (pTNM) stage, Fuhrman grade and morphology. With respect to therapy,  
50  
51 233 information is collected on type of treatment (type of nephrectomy, type of ablation), operation  
52  
53 234 time, blood loss, complications (Clavien-Dindo classification) and length of hospital stay.  
54  
55 235 Furthermore, data on performance status (e.g. WHO performance status, ASA score) are  
56  
57 236 collected.  
58  
59  
60

1  
2  
3 237  
4  
5 238 Data on clinical outcomes, i.e. recurrence and progression with dates of diagnosis, stage and  
6  
7 239 Fuhrman grade, and survival, are also collected. We will continue to collect further information  
8  
9 240 on these clinical outcomes in the future to evaluate their association with body composition  
10  
11 241 features, lifestyle habits and circulating biomarkers.

12  
13  
14 242

#### 15 243 *Power calculation and data analyses*

16 244 The power calculation of this study is based on our initial research question, i.e. the cross-  
17  
18 245 sectional association of patient and tumour characteristics, lifestyle habits, and circulating  
19  
20 246 concentrations of biomarkers with body composition features. With 369 patients, we will have  
21  
22 247 sufficient power ( $\geq 80\%$ ) to detect a multiple correlation coefficient of 0.30 (Cohen's  $f^2=0.10$  for  
23  
24 248 patient and tumour characteristics, dietary and lifestyle habits, and circulating concentrations  
25  
26 249 of biomarkers with body composition features), corresponding to a small ( $f^2=0.02$ ) to medium  
27  
28 250 ( $f^2=0.15$ ) effect size (46). This power calculation is based on 276 stage I-III patients (assuming  
29  
30 251 75% available and analyzable CT scans), 19 predictor variables, and 3 body composition  
31  
32 252 features as outcome variables (cross-sectional area and radiodensity of SM and cross-  
33  
34 253 sectional area of VAT). For the power calculation, we correct for multiplicity (3 body  
35  
36 254 composition features) by using the Bonferroni corrected alpha of 0.05/3.

37 255 Patient characteristics were described using means and standard deviations (SD), medians  
38  
39 256 and interquartile ranges (IQR), or total numbers and percentages where appropriate.  
40  
41 257 Differences in sociodemographic and clinical characteristics between participants and non-  
42  
43 258 participants were evaluated with chi-squared tests. Two-sided p-values  $< 0.05$  were considered  
44  
45 259 statistically significant. Multiple linear regression analyses will be used to estimate the cross-  
46  
47 260 sectional association of patient and tumor characteristics, lifestyle habits, and biomarkers with  
48  
49 261 body composition features. Longitudinal associations of body composition features, lifestyle  
50  
51 262 habits and biomarkers with HRQoL will be assessed using linear mixed models. Logistic  
52  
53 263 regression and Cox proportional hazard analyses will be used to estimate the association of  
54  
55  
56  
57  
58  
59  
60

1  
2  
3 264 body composition features, lifestyle habits and biomarkers with other clinical outcomes. All  
4  
5 265 statistical analyses will be conducted in R.  
6

7 266

## 9 267 **FINDINGS TO DATE**

### 11 268 **Characteristics of study participants**

13 269 From January 2018 to June 2021, 882 patients diagnosed with stage I-III RCC were invited to  
14  
15 270 participate. Recruitment was paused between 16 March and 18 May 2020 due to Covid-19  
16  
17 271 measures. In total, 836 patients were eligible and 368 patients agreed to participate and filled  
18  
19 272 out the first or second questionnaires (response rate 44%) (**Figure 2**). The median time  
20  
21 273 between time of treatment and time of the 3mo questionnaire completion was 13 weeks  
22  
23 274 (interquartile range 12-14 weeks). The number of questionnaires, ActivPal measurements and  
24  
25 275 blood samples available at 3mo are also shown in **Figure 2**.  
26  
27

28 276

### 30 277 **Figure 2** Flowchart of the ReLife study

32 278

34 279 In **Table 2**, the baseline characteristics of the cohort are presented. The mean age of patients  
35  
36 280 was  $62.4 \pm 9.0$  years and 70% was male. Most patients had stage I (65%) and Fuhrman grade  
37  
38 281 2 (50%) disease. The majority was treated with radical (57%) or partial nephrectomy (42%).  
39  
40 282 The majority of participants were overweight (44%) or obese (25%) and 50% were former  
41  
42 283 smokers. Participants were more likely to be female than non-participants but were  
43  
44 284 comparable with respect to age, tumour stage, tumour grade, morphology and type of  
45  
46 285 treatment (**Table 3**).  
47  
48  
49  
50  
51  
52  
53  
54  
55  
56  
57  
58  
59  
60

286 **Table 2.** Baseline characteristics of 368 patients with renal cell cancer included in the ReLife  
287 study

|                                                       |              |
|-------------------------------------------------------|--------------|
| Age at diagnosis (y)                                  | 62.4 ± 9.0   |
| Sex                                                   |              |
| Male                                                  | 257 (70)     |
| Female                                                | 111 (30)     |
| Race                                                  |              |
| White                                                 | 356 (97)     |
| Black                                                 | 1 (0.3)      |
| Asian                                                 | 3 (1)        |
| Other                                                 | 5 (1)        |
| Missing                                               | 3 (1)        |
| Educational level <sup>a</sup>                        |              |
| Low                                                   | 151 (41)     |
| Medium                                                | 115 (31)     |
| High                                                  | 98 (27)      |
| Missing                                               | 4 (1)        |
| Paid occupation                                       |              |
| Yes                                                   | 170 (46)     |
| No                                                    | 195 (53)     |
| Missing                                               | 3 (1)        |
| Living situation                                      |              |
| Alone                                                 | 48 (13)      |
| With partner                                          | 228 (62)     |
| With partner and kids                                 | 81 (22)      |
| Alone, but with kids                                  | 8 (2)        |
| Missing                                               | 3 (1)        |
| BMI (kg/m <sup>2</sup> )                              | 27.6 ± 4.7   |
| BMI (kg/m <sup>2</sup> )                              |              |
| Underweight (≤18.5)                                   | 1 (0.3)      |
| Normal weight (18.5-25)                               | 110 (30)     |
| Overweight (25-≤30)                                   | 163 (44)     |
| Obese (>30)                                           | 91 (25)      |
| Missing                                               | 3 (1)        |
| Waist circumference (cm) <sup>b</sup>                 | 101.2 ± 12.1 |
| Hip circumference (cm) <sup>b</sup>                   | 102.1 ± 9.5  |
| Cigarette smoking status                              |              |
| Current                                               | 43 (12)      |
| Former                                                | 185 (50)     |
| Never                                                 | 137 (37)     |
| Missing                                               | 3 (1)        |
| Alcohol consumption (g/d)                             |              |
| 0                                                     | 104 (28)     |
| >0-10                                                 | 145 (39)     |
| >10                                                   | 101 (27)     |
| Missing                                               | 18 (5)       |
| Total moderate-to-vigorous physical activity (min/wk) |              |
| <75                                                   | 27 (7)       |
| 75-150                                                | 142 (39)     |
| ≥150                                                  | 193 (52)     |
| Missing                                               | 6 (2)        |
| Tumor stage                                           |              |
| I                                                     | 238 (65)     |
| II                                                    | 55 (15)      |

|                       |          |
|-----------------------|----------|
| III                   | 75 (20)  |
| Fuhrman grade         |          |
| 1                     | 49 (13)  |
| 2                     | 185 (50) |
| 3                     | 67 (18)  |
| 4                     | 23 (6)   |
| unknown               | 44 (12)  |
| Treatment             |          |
| Radical nephrectomy   | 210 (57) |
| Partial nephrectomy   | 152 (41) |
| Ablation <sup>c</sup> | 6 (2)    |
| Comorbidities         |          |
| 0                     | 54 (15)  |
| 1                     | 85 (23)  |
| ≥2                    | 226 (61) |
| Missing               | 3 (1)    |

Values are mean ± SD or n (%).

<sup>a</sup> Low (primary, secondary, vocational education), medium (intermediate vocational education, higher general secondary education, pre-university education), high (university of vocational education, university)

<sup>b</sup> Values for 8 participants were missing

<sup>c</sup> Other treatment consists of cryoablation (n=2), radiofrequency ablation (n=3) and microwave ablation (n=1)

**Table 3.** Comparison of demographic and clinical characteristics of 368 patients with renal cell cancer included in the ReLife study and 468 invited non-participants

|                          | Participants | Non-participants | P-value <sup>a</sup> |
|--------------------------|--------------|------------------|----------------------|
| N                        | 368          | 468              |                      |
| Age category (y)         |              |                  |                      |
| 18-44                    | 14 (4)       | 28 (6)           | 0.34                 |
| 45-64                    | 180 (49)     | 218 (47)         |                      |
| 65-75                    | 174 (47)     | 222 (47)         |                      |
| Sex                      |              |                  |                      |
| Male                     | 257 (70)     | 360 (77)         | 0.02                 |
| Female                   | 111 (30)     | 108 (23)         |                      |
| Tumor stage              |              |                  |                      |
| I                        | 238 (65)     | 298 (64)         | 0.51                 |
| II                       | 55 (15)      | 61 (13)          |                      |
| III                      | 75 (20)      | 109 (23)         |                      |
| Fuhrman grade            |              |                  |                      |
| 1                        | 49 (13)      | 86 (18)          | 0.32                 |
| 2                        | 185 (50)     | 219 (47)         |                      |
| 3                        | 67 (18)      | 74 (16)          |                      |
| 4                        | 23 (6)       | 33 (7)           |                      |
| unknown                  | 44 (12)      | 56 (12)          |                      |
| Morphology               |              |                  | 0.97                 |
| Clear cell renal tumour  | 260 (71)     | 338 (72)         |                      |
| Papillary renal tumour   | 48 (13)      | 58 (12)          |                      |
| Chromophobe renal tumour | 25 (7)       | 30 (6)           |                      |
| Other <sup>b</sup>       | 35 (9)       | 42 (9)           |                      |
| Treatment                |              |                  |                      |
| Radical nephrectomy      | 210 (57)     | 272 (58)         | 0.76                 |
| Partial nephrectomy      | 152 (41)     | 191 (41)         |                      |
| Ablation <sup>c</sup>    | 6 (2)        | 5 (1)            |                      |

Values are n (%).

<sup>a</sup> From chi-squared test.

1  
2  
3 299 <sup>b</sup> Other morphology consists of adenocarcinoma with mixed subtypes (n=4 and n=5), eosinophilic solid and cystic  
4 300 renal cell carcinoma (n=1 and n=0), renal cell carcinoma not otherwise specified (n=28 and n=29), sarcomatoid  
5 301 renal cell carcinoma (n=2 and n=6), collecting duct carcinoma (n=0 and n=1), and clear cell papillary renal cell  
6 302 tumour (n=0 and n=1) for participants and non-participants, respectively.  
7 303 <sup>c</sup> Other treatment consists of cryoablation (n=2 and n=2), radiofrequency ablation (n=3 and n=2), and microwave  
8 304 ablation (n=1 and n=1) for participants and non-participants, respectively.  
9 305

10  
11  
12  
13  
14  
15  
16  
17  
18  
19  
20  
21  
22  
23  
24  
25  
26  
27  
28  
29  
30  
31  
32  
33  
34  
35  
36  
37  
38  
39  
40  
41  
42  
43  
44  
45  
46  
47  
48  
49  
50  
51  
52  
53  
54  
55  
56  
57  
58  
59  
60

For peer review only

1  
2  
3 306 **FUTURE PLANS**  
4

5 307 We have already started and will first continue to work on the statistical analyses and writing  
6  
7 308 of manuscripts addressing our main study objectives, i.e. 1) the association of patient and  
8  
9 309 tumour characteristics, lifestyle habits, and circulating biomarkers with body composition  
10  
11 310 features, and 2) the association of body composition features, lifestyle habits and circulating  
12  
13 311 biomarkers with clinical outcomes, including postoperative outcomes (e.g. complications,  
14  
15 312 length of hospital stay), and HRQOL. Statistical analyses for recurrence, progression, and  
16  
17 313 survival will be conducted once follow-up is more mature or pooling with similar cohorts  
18  
19 314 becomes possible.  
20  
21

22 315

23  
24 316 **STRENGTHS AND LIMITATIONS**  
25

26 317 To our knowledge, the ReLife study is the first population-based prospective longitudinal  
27  
28 318 study on lifestyle-related factors and clinical outcomes in patients with localized RCC  
29  
30 319 worldwide. Comprehensive data on lifestyle-related factors and HRQOL are collected at 3  
31  
32 320 months, 1 year and 2 years after treatment. Besides questionnaire data on lifestyle-related  
33  
34 321 factors, also objective data on body composition and physical activity are collected. Data on  
35  
36 322 sociodemographic variables and comorbidity is available as well. Information on several  
37  
38 323 clinical outcomes is collected, including postoperative outcomes (e.g. complications, length  
39  
40 324 of hospital stay), recurrence, progression, survival, and HRQOL. Moreover, blood samples  
41  
42 325 are collected to measure lifestyle-related, disease-related and genetic biomarkers.  
43  
44

45 326 Permission is available from participants to use their tumour tissue blocks for assessment of  
46  
47 327 tumour characteristics and acquired genetic alterations.  
48

49 328 However, there are also some limitations to this study. As is the case for all longitudinal  
50  
51 329 studies, participants may drop out during the course of the study, potentially leading to  
52  
53 330 selection bias. Some variables have missing values which will be addressed using multiple  
54  
55 331 imputation when applicable. No information on lifestyle-related factors and HRQOL after the  
56  
57 332 two-years follow-up measurement is available. Power for survival analyses is likely to be  
58  
59  
60

1  
2  
3 333 insufficient and future pooling with other studies may be necessary. Lastly, we did not use  
4  
5 334 RCC-specific measures of HRQOL in our study.  
6  
7 335 Results that can be obtained from this study are important to develop personalized evidence-  
8  
9 336 based lifestyle advice for patients with localized RCC to improve their clinical outcomes.  
10

11 337

## 12 338 **COLLABORATION**

13  
14  
15 339 The ReLife study group is open for collaborations with national and international colleagues.  
16  
17 340 Any person interested in collaborating on the ReLife study or in getting access to ReLife data  
18  
19 341 for data analyses can contact the corresponding author. Requests for data will be discussed  
20  
21 342 and decided by the ReLife study group and will require a Data Transfer Agreement.  
22  
23

24 343

## 25 344 **Abbreviations**

26  
27  
28 345 BMI, body mass index; cTNM: clinical TNM stage; DNTP: Dutch National Tissuebank Portal;  
29  
30 346 IKNL: Netherlands Comprehensive Cancer Organisation; IMAT: intramuscular adipose tissue;  
31  
32 347 NCR: Netherlands Cancer Registry; PALGA foundation: Pathological Anatomical National  
33  
34 348 Automate Archive; pTNM: post-surgical TNM stage; RCC: renal cell cancer; SAT:  
35  
36 349 subcutaneous adipose tissue; SD: standard deviation; SM: skeletal muscle; SMD: skeletal  
37  
38 350 muscle density; SMI: skeletal muscle index; SQUASH: Short Questionnaire to Assess Health;  
39  
40 351 TAT: total adipose tissue; 1y: 1 year after treatment; 2y: 2 years after treatment; 3mo: three  
41  
42 352 months after treatment; VAT: visceral adipose tissue.  
43  
44  
45  
46  
47  
48  
49  
50  
51  
52  
53  
54  
55  
56  
57  
58  
59  
60

1  
2  
3 353 **DECLARATIONS**

4  
5 354 **Acknowledgements**

6  
7 355 We are grateful to all the patients who participate in this study and we thank the following  
8  
9 356 hospitals for their involvement in recruitment for the ReLife study: Amphia Ziekenhuis,  
10  
11 357 Breda/Oosterhout (D.K.E. van der Schoot); Ziekenhuis Bernhoven, Uden (A.Q.H.J. Niemer);  
12  
13 358 Canisius-Wilhelmina Ziekenhuis, Nijmegen (D.M. Somford); Catharina Ziekenhuis,  
14  
15 359 Eindhoven (W.A. Scheepens); Elisabeth-TweeSteden Ziekenhuis, Tilburg/Waalwijk (P.J.M.  
16  
17 360 Kil, B.P. Wijsman); Elkerliek Ziekenhuis, Helmond (P.J. van Hest); Gelre Ziekenhuizen,  
18  
19 361 Apeldoorn/Zutphen (D.M. Bochove-Overgaauw); Jeroen Bosch Ziekenhuis, 's-  
20  
21 362 Hertogenbosch (S. van der Meer); Maasziekenhuis Pantein, Boxmeer (E. van Boven);  
22  
23 363 Maxima Medisch Centrum, Veldhoven/Eindhoven (L.M.C.L. Fossion, K. de Laet); Meander  
24  
25 364 Medisch Centrum, Amersfoort (F.S. van Rey); Radboudumc, Nijmegen; Rijnstate,  
26  
27 365 Arnhem/Velp/Zevenaar (G.A.H.J Smits); Slingeland Ziekenhuis, Doetinchem (A.D.H.  
28  
29 366 Geboers); St. Jansdal Ziekenhuis, Harderwijk (W.J. Kniestedt); UMC Utrecht (R.P. Meijer);  
30  
31 367 Ziekenhuis Gelderse Vallei, Ede (M.D.H. Kortleve); Ziekenhuisgroep Twente,  
32  
33 368 Almelo/Hengelo (S. Stomps). In addition, we thank Ms. Ivy Beeren, Ms. Monique  
34  
35 369 Eijgenberger, Ms. Jolanda van Haren and Ms. Ursula Oldenhof for their assistance in data  
36  
37 370 collection. We also thank the data managers of the Netherlands Cancer Registry held by the  
38  
39 371 Netherlands Comprehensive Cancer Organisation (IKNL) for inviting patients and collecting  
40  
41 372 the clinical data.  
42  
43  
44

45 373

46  
47 374 **Authors' contributions**

48  
49 375 AV, EK, JPM, JSFM, KKHA, and LALMK contributed to the conception and design of the  
50  
51 376 study. AV provides overall study management and coordinates the project. JSFM contributed  
52  
53 377 to data collection. AV and JSFM drafted the manuscript. All authors have critically read and  
54  
55 378 revised the manuscript. All authors approved the final version of the manuscript.  
56  
57

58 379

59  
60 380 **Funding**

1  
2  
3 381 This project is funded by the Dutch Cancer Society (KUN 2015-7948). Sponsors were not  
4  
5 382 involved in the study design nor will they be in the collection, analysis, and interpretation of  
6  
7 383 data, or in the publications that will result from this study.  
8

9 384

### 11 385 **Competing interests**

13 386 The authors declare that they have no competing interests.

15 387

### 18 388 **Ethics approval and consent to participate**

20 389 The study protocol has been approved on March 2, 2017 by the Committee for Human  
21  
22 390 Research region Arnhem-Nijmegen (CMO 2016-3078). Patients who agreed to participate in  
23  
24 391 the study provided a written informed consent.

26 392

### 28 393 **Consent for publication**

30 394 Not applicable.

32 395

### 35 396 **Availability of data and material**

37 397 Data and material are not yet available since data collection has not been completed yet.

39 398 After completion of data collection, data will be made available by the corresponding author  
40  
41 399 upon reasonable request.

43 400

## 401 REFERENCES

1. Capitanio U, Bensalah K, Bex A, Boorjian SA, Bray F, Coleman J, Gore JL, Sun M, Wood C, Russo P. Epidemiology of Renal Cell Carcinoma. *Eur Urol* 2019;75:74-84.
2. van de Schans SA, Aben KK, Mulders PF, Haanen JB, van Herpen C, Verhoeven RH, Karim-Kos HE, Oosterwijk E, Kiemeny LA. Modest improvement in 20 years of kidney cancer care in the Netherlands. *Eur J Cancer* 2012;48:1822-30.
3. Sung H, Ferlay J, Siegel RL, Laversanne M, Soerjomataram I, Jemal A, Bray F. Global Cancer Statistics 2020: GLOBOCAN Estimates of Incidence and Mortality Worldwide for 36 Cancers in 185 Countries. *CA Cancer J Clin* 2021;71:209-49.
4. (NCR) NCR. Netherlands Comprehensive Cancer Organisation (IKNL), derived via [www.iknl.nl/en/ncr/ncr-data-figures](http://www.iknl.nl/en/ncr/ncr-data-figures) [31 January 2023].
5. Chow WH, Dong LM, Devesa SS. Epidemiology and risk factors for kidney cancer. *Nat Rev Urol* 2010;7:245-57.
6. Ljungberg B, Albiges L, Abu-Ghanem Y, Bedke J, Capitanio U, Dabestani S, Fernandez-Pello S, Giles RH, Hofmann F, Hora M, Klatte T, Kuusk T, Lam TB, Marconi L, Powles T, Tahbaz R, Volpe A, Bex A. European Association of Urology Guidelines on Renal Cell Carcinoma: The 2022 Update. *Eur Urol* 2022.
7. Dabestani S, Marconi L, Kuusk T, Bex A. Follow-up after curative treatment of localised renal cell carcinoma. *World J Urol* 2018;36:1953-9.
8. Volpe A, Patard JJ. Prognostic factors in renal cell carcinoma. *World J Urol* 2010;28:319-27.
9. Laguna MP, Algaba F, Cadeddu J, Clayman R, Gill I, Gueglio G, Hohenfellner M, Joyce A, Landman J, Lee B, van Poppel H, Clinical Research Office of the Endourological Society Renal Mass S. Current patterns of presentation and treatment of renal masses: a clinical research office of the endourological society prospective study. *J Endourol* 2014;28:861-70.
10. Renehan AG, Tyson M, Egger M, Heller RF, Zwahlen M. Body-mass index and incidence of cancer: a systematic review and meta-analysis of prospective observational studies. *Lancet* 2008;371:569-78.
11. Parkin DM, Boyd L. 8. Cancers attributable to overweight and obesity in the UK in 2010. *Br J Cancer* 2011;105 Suppl 2:S34-7.
12. Lanting CI, de Vroome EM, Elias SG, van den Brandt PA, van Leeuwen FE, Kampman E, Kiemeny LA, Peeters PH, de Vries E, Bausch-Goldbohm RA. [Contribution of lifestyle factors to cancer: secondary analysis of Dutch data over 2010 and a projection for 2020]. *Ned Tijdschr Geneesk* 2014;159:A8085.
13. Choi Y, Park B, Jeong BC, Seo SI, Jeon SS, Choi HY, Adami HO, Lee JE, Lee HM. Body mass index and survival in patients with renal cell carcinoma: a clinical-based cohort and meta-analysis. *Int J Cancer* 2013;132:625-34.
14. Kim LH, Doan P, He Y, Lau HM, Pleass H, Patel MI. A Systematic Review and Meta-Analysis of the Significance of Body Mass Index on Kidney Cancer Outcomes. *J Urol* 2021;205:346-55.
15. Mourtzakis M, Prado CM, Lieffers JR, Reiman T, McCargar LJ, Baracos VE. A practical and precise approach to quantification of body composition in cancer patients using computed tomography images acquired during routine care. *Appl Physiol Nutr Metab* 2008;33:997-1006.
16. Shen W, Punyanitya M, Wang Z, Gallagher D, St-Onge MP, Albu J, Heymsfield SB, Heshka S. Total body skeletal muscle and adipose tissue volumes: estimation from a single abdominal cross-sectional image. *J Appl Physiol* (1985) 2004;97:2333-8.
17. Shen W, Punyanitya M, Wang Z, Gallagher D, St-Onge MP, Albu J, Heymsfield SB, Heshka S. Visceral adipose tissue: relations between single-slice areas and total volume. *Am J Clin Nutr* 2004;80:271-8.
18. Weerink LBM, van der Hoorn A, van Leeuwen BL, de Bock GH. Low skeletal muscle mass and postoperative morbidity in surgical oncology: a systematic review and meta-analysis. *J Cachexia Sarcopenia Muscle* 2020;11:636-49.

- 1  
2  
3 452 19. Xiao J, Mazurak VC, Olobatuyi TA, Caan BJ, Prado CM. Visceral adiposity and cancer survival:  
4 453 a review of imaging studies. *Eur J Cancer Care (Engl)* 2018;27:e12611.  
5 454 20. Shachar SS, Williams GR, Muss HB, Nishijima TF. Prognostic value of sarcopenia in adults with  
6 455 solid tumours: A meta-analysis and systematic review. *Eur J Cancer* 2016;57:58-67.  
7 456 21. Aleixo GFP, Shachar SS, Nyrop KA, Muss HB, Malpica L, Williams GR. Myosteatosis and  
8 457 prognosis in cancer: Systematic review and meta-analysis. *Crit Rev Oncol Hematol*  
9 458 2020;145:102839.  
10 459 22. Vrieling A, Kampman E, Knijnenburg NC, Mulders PF, Sedelaar JPM, Baracos VE, Kiemeny LA.  
11 460 Body Composition in Relation to Clinical Outcomes in Renal Cell Cancer: A Systematic Review  
12 461 and Meta-analysis. *Eur Urol Focus* 2018;4:420-34.  
13 462 23. Psutka SP, Boorjian SA, Moynagh MR, Schmit GD, Costello BA, Thompson RH, Stewart-Merrill  
14 463 SB, Lohse CM, Cheville JC, Leibovich BC, Tollefson MK. Decreased Skeletal Muscle Mass is  
15 464 Associated with an Increased Risk of Mortality Following Radical Nephrectomy for Localized  
16 465 Renal Cell Cancer. *J Urol* 2015;195:270-6.  
17 466 24. Maurits JSF, Sedelaar JPM, Mulders PFA, Aben KKH, Kiemeny L, Vrieling A. Skeletal muscle  
18 467 radiodensity and visceral adipose tissue index are associated with survival in renal cell cancer  
19 468 - A multicenter population-based cohort study. *Clin Nutr* 2022;41:131-43.  
20 469 25. Kaneko G, Miyajima A, Yuge K, Yazawa S, Mizuno R, Kikuchi E, Jinzaki M, Oya M. Visceral  
21 470 obesity is associated with better recurrence-free survival after curative surgery for Japanese  
22 471 patients with localized clear cell renal cell carcinoma. *Jpn J Clin Oncol* 2015;45:210-6.  
23 472 26. Naya Y, Zenbutsu S, Araki K, Nakamura K, Kobayashi M, Kamijima S, Imamoto T, Nihei N,  
24 473 Suzuki H, Ichikawa T, Igarashi T. Influence of visceral obesity on oncologic outcome in  
25 474 patients with renal cell carcinoma. *Urol Int* 2010;85:30-6.  
26 475 27. Lee HW, Jeong BC, Seo SI, Jeon SS, Lee HM, Choi HY, Jeon HG. Prognostic significance of  
27 476 visceral obesity in patients with advanced renal cell carcinoma undergoing nephrectomy. *Int*  
28 477 *J Urol* 2015;22:455-61.  
29 478 28. Bredella MA. Sex Differences in Body Composition. *Adv Exp Med Biol* 2017;1043:9-27.  
30 479 29. Wulan SN, Westerterp KR, Plasqui G. Ethnic differences in body composition and the  
31 480 associated metabolic profile: a comparative study between Asians and Caucasians. *Maturitas*  
32 481 2010;65:315-9.  
33 482 30. Keehn A, Srivastava A, Maiman R, Taylor J, DiVito J, Ghavamian R, Stern JM. The relationship  
34 483 between visceral obesity and the clinicopathologic features of patients with small renal  
35 484 masses. *J Endourol* 2015;29:372-6.  
36 485 31. Guo H, Zhao W, Wang A, Li M, Ma H, Wang F, Wang Q, Ba X. The value of sex-specific  
37 486 abdominal visceral fat as measured via CT as a predictor of clear renal cell carcinoma T stage.  
38 487 *Adipocyte* 2021;10:285-92.  
39 488 32. Cumberbatch MG, Rota M, Catto JW, La Vecchia C. The Role of Tobacco Smoke in Bladder  
40 489 and Kidney Carcinogenesis: A Comparison of Exposures and Meta-analysis of Incidence and  
41 490 Mortality Risks. *Eur Urol* 2016;70:458-66.  
42 491 33. Al-Bayati O, Hasan A, Pruthi D, Kaushik D, Liss MA. Systematic review of modifiable risk  
43 492 factors for kidney cancer. *Urol Oncol* 2019;37:359-71.  
44 493 34. Pinthus JH, Kleinmann N, Tisdale B, Chatterjee S, Lu JP, Gillis A, Hamlet T, Singh G, Farrokhyar  
45 494 F, Kapoor A. Lower plasma adiponectin levels are associated with larger tumor size and  
46 495 metastasis in clear-cell carcinoma of the kidney. *Eur Urol* 2008;54:866-73.  
47 496 35. Horiguchi A, Ito K, Sumitomo M, Kimura F, Asano T, Hayakawa M. Decreased serum  
48 497 adiponectin levels in patients with metastatic renal cell carcinoma. *Jpn J Clin Oncol*  
49 498 2008;38:106-11.  
50 499 36. Horiguchi A, Sumitomo M, Asakuma J, Asano T, Zheng R, Asano T, Nanus DM, Hayakawa M.  
51 500 Increased serum leptin levels and over expression of leptin receptors are associated with the  
52 501 invasion and progression of renal cell carcinoma. *J Urol* 2006;176:1631-5.  
53  
54  
55  
56  
57  
58  
59  
60

- 1  
2  
3 502 37. Steffens S, Kohler A, Rudolph R, Eggers H, Seidel C, Janssen M, Wegener G, Schrader M,  
4 503 Kuczyk MA, Schrader AJ. Validation of CRP as prognostic marker for renal cell carcinoma in a  
5 504 large series of patients. *BMC Cancer* 2012;12:399.  
6 505 38. de Martino M, Leitner CV, Hofbauer SL, Lucca I, Haitel A, Shariat SF, Klatter T. Serum  
7 506 Adiponectin Predicts Cancer-specific Survival of Patients with Renal Cell Carcinoma. *Eur Urol*  
8 507 *Focus* 2016;2:197-203.  
9 508 39. Wendel-Vos GW, Schuit AJ, Saris WH, Kromhout D. Reproducibility and relative validity of the  
10 509 short questionnaire to assess health-enhancing physical activity. *Journal of clinical*  
11 510 *epidemiology* 2003;56:1163-9.  
12 511 40. de Vries JH, de Groot LC, van Staveren WA. Dietary assessment in elderly people: experiences  
13 512 gained from studies in the Netherlands. *Eur J Clin Nutr* 2009;63 Suppl 1:S69-74.  
14 513 41. Siebelink E, Geelen A, de Vries JH. Self-reported energy intake by FFQ compared with actual  
15 514 energy intake to maintain body weight in 516 adults. *Br J Nutr* 2011;106:274-81.  
16 515 42. Streppel MT, de Vries JH, Meijboom S, Beekman M, de Craen AJ, Slagboom PE, Feskens EJ.  
17 516 Relative validity of the food frequency questionnaire used to assess dietary intake in the  
18 517 Leiden Longevity Study. *Nutr J* 2013;12:75.  
19 518 43. NEVO. NEVO-tabel: Dutch food composition database. Den Haag: RIVM/Voedingscentrum,  
20 519 2011.  
21 520 44. Aaronson NK, Ahmedzai S, Bergman B, Bullinger M, Cull A, Duez NJ, Filiberti A, Flechtner H,  
22 521 Fleishman SB, de Haes JC. The European Organization for Research and Treatment of Cancer  
23 522 QLQ-C30: a quality-of-life instrument for use in international clinical trials in oncology. *JNCI:*  
24 523 *Journal of the National Cancer Institute* 1993;85:365-76.  
25 524 45. Godfrey A, Culhane KM, Lyons GM. Comparison of the performance of the activPAL  
26 525 Professional physical activity logger to a discrete accelerometer-based activity monitor. *Med*  
27 526 *Eng Phys* 2007;29:930-4.  
28 527 46. Faul F, Erdfelder E, Buchner A, Lang AG. Statistical power analyses using G\*Power 3.1: tests  
29 528 for correlation and regression analyses. *Behav Res Methods* 2009;41:1149-60.  
30  
31  
32  
33  
34 529  
35  
36  
37  
38  
39  
40  
41  
42  
43  
44  
45  
46  
47  
48  
49  
50  
51  
52  
53  
54  
55  
56  
57  
58  
59  
60

1  
2  
3  
4  
5  
6  
7  
8  
9  
10  
11  
12  
13  
14  
15  
16  
17  
18  
19  
20  
21  
22  
23  
24  
25  
26  
27  
28  
29  
30  
31  
32  
33  
34  
35  
36  
37  
38  
39  
40  
41  
42  
43  
44  
45  
46  
47  
48  
49  
50  
51  
52  
53  
54  
55  
56  
57  
58  
59  
60

530 **Figure 1.** Timeline and study design of the ReLife study

531 **Figure 2.** Flow chart of the ReLife study

532

For peer review only

533

For peer review only

1  
2  
3  
4  
5  
6  
7  
8  
9  
10  
11  
12  
13  
14  
15  
16  
17  
18  
19  
20  
21  
22  
23  
24  
25  
26  
27  
28  
29  
30  
31  
32  
33  
34  
35  
36  
37  
38  
39  
40  
41  
42  
43  
44  
45  
46  
47  
48  
49  
50  
51  
52  
53  
54  
55  
56  
57  
58  
59  
60

## Overview ReLife study



# RE LIFE



# BMJ Open

## Cohort profile: The ReLife (Renal cell cancer: Lifestyle, prognosis, and quality of life) study in the Netherlands

|                                 |                                                                                                                                                                                                                                                                                                                                                                                                                                                                                      |
|---------------------------------|--------------------------------------------------------------------------------------------------------------------------------------------------------------------------------------------------------------------------------------------------------------------------------------------------------------------------------------------------------------------------------------------------------------------------------------------------------------------------------------|
| Journal:                        | <i>BMJ Open</i>                                                                                                                                                                                                                                                                                                                                                                                                                                                                      |
| Manuscript ID                   | bmjopen-2022-066909.R2                                                                                                                                                                                                                                                                                                                                                                                                                                                               |
| Article Type:                   | Cohort profile                                                                                                                                                                                                                                                                                                                                                                                                                                                                       |
| Date Submitted by the Author:   | 09-Mar-2023                                                                                                                                                                                                                                                                                                                                                                                                                                                                          |
| Complete List of Authors:       | Maurits, Jake; Radboudumc, Department for Health Evidence<br>Sedelaar, Michiel; Radboudumc, Department of Urology<br>Aben, Katja; Netherlands Cancer Registry; Radboudumc, Department for Health Evidence<br>Kampman, Ellen; Wageningen University & Research, Division of Human Nutrition and Health; Radboudumc, Department for Health Evidence<br>Kiemeneij, Lambertus; Radboudumc, Department for Health Evidence<br>Vrieling, Alina; Radboudumc, Department for Health Evidence |
| <b>Primary Subject Heading</b>: | Epidemiology                                                                                                                                                                                                                                                                                                                                                                                                                                                                         |
| Secondary Subject Heading:      | Oncology                                                                                                                                                                                                                                                                                                                                                                                                                                                                             |
| Keywords:                       | NUTRITION & DIETETICS, Kidney tumours < ONCOLOGY, Epidemiology < ONCOLOGY, PREVENTIVE MEDICINE                                                                                                                                                                                                                                                                                                                                                                                       |
|                                 |                                                                                                                                                                                                                                                                                                                                                                                                                                                                                      |

SCHOLARONE™  
Manuscripts



I, the Submitting Author has the right to grant and does grant on behalf of all authors of the Work (as defined in the below author licence), an exclusive licence and/or a non-exclusive licence for contributions from authors who are: i) UK Crown employees; ii) where BMJ has agreed a CC-BY licence shall apply, and/or iii) in accordance with the terms applicable for US Federal Government officers or employees acting as part of their official duties; on a worldwide, perpetual, irrevocable, royalty-free basis to BMJ Publishing Group Ltd ("BMJ") its licensees and where the relevant Journal is co-owned by BMJ to the co-owners of the Journal, to publish the Work in this journal and any other BMJ products and to exploit all rights, as set out in our [licence](#).

The Submitting Author accepts and understands that any supply made under these terms is made by BMJ to the Submitting Author unless you are acting as an employee on behalf of your employer or a postgraduate student of an affiliated institution which is paying any applicable article publishing charge ("APC") for Open Access articles. Where the Submitting Author wishes to make the Work available on an Open Access basis (and intends to pay the relevant APC), the terms of reuse of such Open Access shall be governed by a Creative Commons licence – details of these licences and which [Creative Commons](#) licence will apply to this Work are set out in our licence referred to above.

Other than as permitted in any relevant BMJ Author's Self Archiving Policies, I confirm this Work has not been accepted for publication elsewhere, is not being considered for publication elsewhere and does not duplicate material already published. I confirm all authors consent to publication of this Work and authorise the granting of this licence.

1  
2  
3 1 **Cohort profile: The ReLife (Renal cell cancer: Lifestyle, prognosis, and quality of life)**  
4  
5 2 **study in the Netherlands**  
6

7 3  
8  
9 4 Jake. S.F. Maurits<sup>a</sup>, J.P. Michiel Sedelaar<sup>b</sup>, Katja K.H. Aben<sup>a,c</sup>, Ellen Kampman<sup>a,d</sup>, Lambertus  
10  
11 5 A.L.M. Kiemeney<sup>a,b</sup>, Alina Vrieling<sup>a</sup>  
12  
13

14 6  
15 7 <sup>a</sup> Department for Health Evidence, Radboud University Medical Center, Nijmegen, The  
16  
17 8 Netherlands

18  
19  
20 9 <sup>b</sup> Department of Urology, Radboud University Medical Center, Nijmegen, The Netherlands

21  
22  
23 10 <sup>c</sup> Department of Research and Development, Netherlands Comprehensive Cancer  
24  
25 11 Organisation, Utrecht, The Netherlands

26  
27  
28 12 <sup>d</sup> Division of Human Nutrition and Health, Wageningen University, Wageningen, The  
29  
30 13 Netherlands

31  
32  
33 14  
34  
35  
36 15 **Corresponding author:** Dr. Alina Vrieling, Radboud university medical center, Department  
37  
38 16 for Health Evidence (Mailbox 133), P.O. Box 9101, 6500 HB Nijmegen, The Netherlands.  
39  
40 17 Tel: +31 24 3616944, Fax: +31 24 3613505, e-mail: Alina.Vrieling@radboudumc.nl  
41  
42

43 18  
44  
45 19 **Keywords:** renal cell cancer, diet, lifestyle, body composition, biomarkers, quality of life,  
46  
47 20 cohort profile  
48  
49

50  
51 21  
52  
53 22 **Word count:** 2349  
54  
55  
56  
57  
58  
59  
60

**ABSTRACT****Purpose:**

The ReLife study is set up to obtain insight into the association of patient and tumour characteristics, lifestyle habits and circulating biomarkers with body composition features in patients with localized renal cell cancer (RCC). Further, it aims to assess the association of body composition features, lifestyle habits and circulating biomarkers with clinical outcomes including health-related quality of life.

**Participants:**

The ReLife study is a multicenter prospective cohort study involving 368 patients with newly diagnosed stage I-III RCC recruited from January 2018-June 2021 from 18 hospitals in the Netherlands. At 3 months, 1 and 2 years after treatment, participants fill out a general questionnaire and questionnaires about their lifestyle habits (e.g. diet, physical activity, smoking, alcohol consumption), medical history, and health-related quality of life. At all 3 time points, patients wear an accelerometer and have blood samples taken. CT scans for body composition analysis are being collected. Permission is asked for collection of tumour samples. Information about disease characteristics, treatment of the primary tumour and clinical outcomes is being collected from medical records by the Netherlands Cancer Registry.

**Findings to date:**

A total of 836 invited patients were eligible and 368 patients were willing to participate and were included (response rate 44%). The mean age of patients was  $62.5 \pm 9.0$  years and 70% was male. The majority had stage I (65%) disease and were treated with radical nephrectomy (57%). Data collection at 3 months and 1 years after treatment has been finalized.

**Future plans:**

Data collection at 2 years after treatment is expected to be finalized in June 2023 and longitudinal clinical data will continue to be collected. Results of studies based on this cohort are important to develop personalized evidence-based lifestyle advice for patients with localized RCC to enable them to get more control over their disease course.

1  
2  
3 **51 STRENGTHS AND LIMITATIONS**  
4

5 52 - The ReLife study is the first population-based prospective cohort study on lifestyle-related  
6  
7 53 factors and clinical outcomes in patients with localized RCC worldwide.

8  
9 54 - Comprehensive data on lifestyle-related factors and quality of life are collected at 3 months,  
10  
11 55 1 year and 2 years after treatment.

12  
13 56 - Both self-reported and objective data on body composition and physical activity are collected.

14  
15 57 - A limitation is that power for survival analyses is likely to be insufficient and future pooling  
16  
17 58 with other studies may be required.  
18  
19  
20  
21  
22  
23  
24  
25  
26  
27  
28  
29  
30  
31  
32  
33  
34  
35  
36  
37  
38  
39  
40  
41  
42  
43  
44  
45  
46  
47  
48  
49  
50  
51  
52  
53  
54  
55  
56  
57  
58  
59  
60

## 59 INTRODUCTION

60 Incidence rates of kidney cancer are increasing [1], which is partly explained by the increased  
61 use of diagnostic imaging but also by the increased prevalence of obesity [2]. The worldwide  
62 number of new kidney cancer cases was estimated to be over 430,000 in 2020 [3]. In the  
63 Netherlands, over 2,700 new cases with kidney cancer were diagnosed in 2019 [4]. More than  
64 90% of kidney cancers are renal cell cancers (RCC) [5]. Of all RCC patients, about 70-80%  
65 are diagnosed with localised disease (stage I-III) and about 20-30% with advanced or  
66 metastatic disease (stage IV) [2]. Almost all RCC patients with localised disease are treated  
67 with partial or radical nephrectomy [6]. Despite this treatment, 20-30% of patients with localised  
68 disease will have a relapse or develop metastatic RCC during follow-up [7]. Five-year relative  
69 survival rates are approximately 90% (stage I and II), 65% (stage III), and 12% (stage IV) [2].

70 Classical prognostic factors for localised RCC include anatomical (e.g., TNM  
71 classification), histological (e.g., tumour grade, histological subtype), clinical (e.g.,  
72 performance status, certain blood values), and molecular features (e.g., *BAP1* and *PBRM1*  
73 mutations), but the combination of these features does not have sufficient predictive accuracy  
74 [8]. In order to provide tailored treatment and follow-up care, the identification of additional  
75 prognostic factors that predict the expected clinical course in each individual patient is subject  
76 of active scientific research.

77 Nowadays, more than 60% of RCC patients are overweight or obese at diagnosis (body  
78 mass index (BMI)  $\geq 25$  kg/m<sup>2</sup>) [9]. A meta-analysis of prospective observational studies showed  
79 a 24% increased risk of RCC for men and a 34% increased risk for women per 5 kg/m<sup>2</sup> increase  
80 in BMI [10]. It is estimated that about 17% and 24% of RCC cases are attributable to  
81 overweight in the Netherlands and in the UK, respectively [11, 12]. Paradoxically, meta-  
82 analyses on BMI and survival suggest that RCC patients who were overweight or obese at  
83 diagnosis have a significantly better overall, cancer-specific, and recurrence-free survival  
84 compared with normal weight patients [13, 14]. The higher risk but better prognosis with higher  
85 BMI is counterintuitive. Possibly, body composition explains part of this paradox.

1  
2  
3 86 Body composition refers to the content of fat, lean tissue and bone in the human body.  
4  
5 87 The amount and distribution of these tissues may be independent of BMI; subjects with similar  
6  
7 88 BMI may have different amounts of visceral adipose tissue (VAT), subcutaneous adipose  
8  
9 89 tissue (SAT), skeletal muscle (SM), and intermuscular adipose tissue (IMAT). Cross-sectional  
10  
11 90 areas and mean radiodensity of these tissues can be assessed by analysis of computed  
12  
13 91 tomography (CT) scans at the level of the third lumbar vertebra (L3), using established  
14  
15 92 Hounsfield Unit (HU) thresholds for each tissue. Cross-sectional total adipose tissue (TAT) and  
16  
17 93 SM areas at L3 are linearly related to body TAT and SM mass [15-17].

18  
19  
20 94 High VAT mass, low SM index (SMI (SM/height<sup>2</sup>)), and low SM radiodensity (SMD) have  
21  
22 95 been associated with adverse postoperative [18] and survival outcomes [19-21] in several  
23  
24 96 cancer types. In our meta-analysis, we showed that low SMI and low SMD are also associated  
25  
26 97 with increased overall mortality in patients with metastatic RCC [22]. No meta-analysis could  
27  
28 98 be performed for localized RCC due to the limited number of studies and heterogeneity in body  
29  
30 99 composition parameters and outcomes [22]. Studies also suggested an association of low vs.  
31  
32 100 high SMI with higher overall and cancer-specific mortality [23] and of lower SMD with higher  
33  
34 101 overall mortality [24]. Other studies found that low vs. high VAT was associated with a higher  
35  
36 102 risk of recurrence [25], cancer-specific [26, 27], and overall mortality [24].

37  
38  
39 103 Body composition is known to differ by age, gender and race [28, 29]. Studies on the  
40  
41 104 association of tumour characteristics with body composition features are inconsistent [30, 31]  
42  
43 105 and studies on the association of lifestyle habits and circulating biomarkers with body  
44  
45 106 composition parameters are not available in patients with RCC. Smoking has been associated  
46  
47 107 with increased RCC risk and RCC-specific mortality [32]. Studies on dietary factors and  
48  
49 108 physical activity are inconsistent for RCC risk [33] and not available for clinical outcomes  
50  
51 109 including health-related quality of life (HRQoL). Some studies suggest that circulating  
52  
53 110 biomarkers (e.g. adiponectin, leptin and CRP) are associated with tumour size [34], invasion,  
54  
55 111 progression or metastasis [34-36] and survival [37, 38] in patients with RCC but results are  
56  
57 112 inconsistent.  
58  
59  
60

1  
2  
3 113 Thus, the association of patient and tumour characteristics, lifestyle habits and circulating  
4  
5 114 biomarkers with body composition features in patients with localized RCC needs to be clarified.  
6  
7 115 Further, there is a clear need to obtain more insight in body composition features and lifestyle  
8  
9 116 habits and their relation with clinical outcomes in patients with localized RCC. This information  
10  
11 117 is important to develop personalized evidence-based lifestyle advice for patients with localized  
12  
13 118 RCC to improve their clinical outcomes. Therefore, the objectives of this study are to evaluate  
14  
15 119 1) the association of patient and tumour characteristics, lifestyle habits, and circulating  
16  
17 120 biomarkers with body composition features, and 2) the association of body composition  
18  
19 121 features, lifestyle habits and circulating biomarkers with clinical outcomes, including  
20  
21 122 postoperative outcomes (e.g. complications, length of hospital stay), recurrence, progression,  
22  
23 123 survival, and HRQoL.  
24  
25  
26  
27  
28  
29  
30  
31  
32  
33  
34  
35  
36  
37  
38  
39  
40  
41  
42  
43  
44  
45  
46  
47  
48  
49  
50  
51  
52  
53  
54  
55  
56  
57  
58  
59  
60

## 124 **COHORT DESCRIPTION**

### 125 **Setting**

126 The ReLife study (**Renal cell cancer: Lifestyle, prognosis, and quality of Life**) is a prospective  
127 cohort study involving patients with newly diagnosed pathologically confirmed primary stage I-  
128 III RCC. Patients were recruited in 18 hospitals in the East, South, and Central parts of the  
129 Netherlands. Before the start of the study, permission was asked from all urologists of the  
130 participating hospitals to select and invite eligible patients from the Netherlands Cancer  
131 Registry (NCR), held by the Netherlands Comprehensive Cancer Organisation (IKNL). Once  
132 every 2 weeks, newly diagnosed patients were identified by IKNL personnel using notification  
133 lists of the Pathological Anatomical National Automate Archive (PALGA foundation) in the  
134 Netherlands. Approximately 10 weeks after treatment (surgery or ablation), patients were  
135 invited by IKNL personnel on behalf of their urologist to participate in this study (**Figure 1**).  
136 Patients who agreed to participate provided a written informed consent. Enrolment started in  
137 January 2018 and ended in June 2021 and collection of follow-up data is still ongoing.

139 **Figure 1** Timeline and study design of the ReLife study

### 141 **Patient and public involvement**

142 Four patient representatives were asked for feedback on the grant proposal and one patient  
143 representative was involved in the design and set-up phase of the study. Patients were not  
144 involved in the conduction of this research, but will be involved in the reporting and dissemination  
145 plans regarding information provision to patients. Results from the study will be communicated  
146 to participants and urologists from the participating hospitals through the study website  
147 ([www.radboudumc.nl/trials/relife](http://www.radboudumc.nl/trials/relife)), through newsletters and through the website of the patient  
148 society. Results will be submitted for publication in peer-reviewed journals and presented at  
149 relevant (inter)national conferences.

### 151 **Participants**

1  
2  
3 152 Eligible participants were between 18 and 75 years old who were newly diagnosed with a  
4  
5 153 histologically confirmed primary stage I-III RCC tumour and who underwent a (partial)  
6  
7 154 nephrectomy or ablation. Patients had to have sufficient command of the Dutch language since  
8  
9 155 all study materials and questionnaires were only available in Dutch. Patients with a previous  
10  
11 156 diagnosis of cancer in the five years before RCC diagnosis and those with a lymph node  
12  
13 157 metastasis or distant metastasis were not eligible.  
14  
15  
16 158

## 17 159 **Data collection and management**

### 18 160 *Questionnaires*

19  
20 161 Participants are asked to complete self-administered web-based or paper-and-pencil-based  
21  
22 162 questionnaires at 3 months (3mo), 1 year (1y) and 2 years (2y) after treatment (**Figure 1, Table**  
23  
24 163 **1**). Web-based questionnaires are collected using Castor EDC. Follow-up telephone calls are  
25  
26 164 made to non-responding participants and to respondents whose questionnaires have missing  
27  
28 165 items.  
29  
30  
31

32 166 The general questionnaire at 3mo contains questions on demographics (age, sex, ethnicity,  
33  
34 167 education, living situation, occupation, marital status) and personal and family history of  
35  
36 168 cancer. All questionnaires collect information about height, body weight, amount and  
37  
38 169 frequency of alcohol consumption during week- and weekend days, smoking habits,  
39  
40 170 comorbidities and the use of dietary supplements and medication. Information on smoking  
41  
42 171 habits is collected in detail, including age or date of starting and stopping smoking, number of  
43  
44 172 cigarettes smoked per day, and duration of smoking. Information about habitual physical  
45  
46 173 activity is collected by using the validated short questionnaire to assess health-enhancing  
47  
48 174 physical activity (SQUASH) [39]. The SQUASH questionnaire assesses the average time,  
49  
50 175 i.e. number of days per week and hours and minutes per day, spent in commuting  
51  
52 176 activities, leisure time activities, household activities, and activities at work in a normal week  
53  
54 177 in the past month. At all three time points, patients are also asked to measure and report  
55  
56 178 their waist and hip circumference.  
57  
58  
59  
60

179 **Table 1.** Overview of data collection in ReLife at the three time points after treatment

|                                       | Measures                                                                                                                                                    | 3mo            | 1y             | 2y             |
|---------------------------------------|-------------------------------------------------------------------------------------------------------------------------------------------------------------|----------------|----------------|----------------|
| <b>Questionnaires</b>                 |                                                                                                                                                             |                |                |                |
| <i>Sociodemographic data</i>          | Date of birth, gender, country of birth of participant, father, mother, race, living situation, marital status, highest level of education, working history | X              |                |                |
| <i>Anthropometry</i>                  | Height at baseline, weight two years before diagnosis, weight loss 3-6 months before diagnosis, average weight during adult life                            | X              |                |                |
| <i>Lifestyle</i>                      | Current body weight, waist and hip circumference                                                                                                            | X              | X              | X              |
|                                       | Current and past smoking behaviour including dose and duration, alcohol consumption, (reasons for) changes in eating habits, mobility                       | X              | X              | X              |
|                                       | Short Questionnaire to Assess Health-enhancing physical activity (29)                                                                                       | X              | X              | X              |
| <i>Medical history</i>                | Frequency and amount of alcohol consumption during week and weekend days (32-34)                                                                            | X              | X              | X              |
|                                       | Changes in eating habits and reasons for/type of changes                                                                                                    |                | X              | X              |
|                                       | Previously diagnosed with cancer, family history of cancer                                                                                                  | X              |                |                |
| <i>Diet</i>                           | Comorbidities, medication use, dietary supplement use                                                                                                       | X              | X              | X              |
|                                       | 163- item Food Frequency Questionnaire                                                                                                                      | X              | X              | X              |
| <i>Health-related quality of life</i> | EORTC QLQ-C30 [40]                                                                                                                                          | X              | X              | X              |
| <b>Accelerometer</b>                  |                                                                                                                                                             |                |                |                |
|                                       | Habitual physical (in)activity, sedentary behavior                                                                                                          | X              | X              | X              |
| <b>Blood</b>                          |                                                                                                                                                             |                |                |                |
|                                       | EDTA whole blood for DNA isolation                                                                                                                          | X              |                |                |
|                                       | EDTA plasma, serum                                                                                                                                          | X              | X              | X              |
| <b>Tissue</b>                         |                                                                                                                                                             |                |                |                |
|                                       | Formalin-fixed paraffin-embedded tissue of the primary tumour                                                                                               | X <sup>a</sup> |                |                |
| <b>CT scan</b>                        |                                                                                                                                                             |                |                |                |
|                                       | Diagnostic CT scan                                                                                                                                          | X              |                |                |
|                                       | Follow-up CT scans                                                                                                                                          |                | X <sup>b</sup> | X <sup>b</sup> |
| <b>Clinical data</b>                  |                                                                                                                                                             |                |                |                |
|                                       | Disease characteristics, treatment                                                                                                                          | X              | X              | X              |
|                                       | Postoperative outcomes, recurrence and progression                                                                                                          | X              | X              | X              |

180 <sup>a</sup> To date only permission, no actual collection.; <sup>b</sup> Dependent on availability.

1  
2  
3 181 Habitual dietary intake is collected at all three time points using a 163-item validated and  
4  
5 182 reproducible self-administered food frequency questionnaire that was developed by  
6  
7 183 Wageningen University [41-43]. The questionnaire contains questions about the frequency of  
8  
9 184 consumption of food products and the portion size during the previous month. Frequency and  
10  
11 185 portion size of consumed food products are multiplied to obtain their intake in grams per day.  
12  
13 186 Nutrient intake is calculated using the Dutch Food Composition Table (NEVO 2010) [44].  
14

15  
16 187  
17  
18 188 Health-related quality of life is assessed at all three time points with the validated EORTC QLQ-  
19  
20 189 C30 [45]. The EORTC QLQ-C30 contains five function scales (physical, role, cognitive,  
21  
22 190 emotional and social functioning), three symptom scales (fatigue, nausea, pain and vomiting)  
23  
24 191 and six single items (dyspnea, insomnia, loss of appetite, constipation, diarrhea, and financial  
25  
26 192 impact), all scored from 1 (not at all) to 4 (very much)) and a global health status scale with  
27  
28 193 ranges from 1 (very poor) to 7 (excellent). All scores will be linearly transformed to a 0 to 100  
29  
30 194 scale.  
31

32  
33 195

#### 34 196 *Accelerometer*

35  
36 197 Habitual physical (in)activity is objectively measured at all three time points using the activPAL  
37  
38 198 physical activity monitor (PAL Technologies, Glasgow, UK). This accelerometer has shown to  
39  
40 199 be an accurate tool for measuring daily physical activity levels [46]. Participants are asked to  
41  
42 200 wear the device continuously on the front right thigh for seven consecutive days. Data are  
43  
44 201 uploaded using the activPAL software.  
45  
46

47 202

#### 48 203 *Blood samples*

49  
50 204 Non-fasting blood samples are collected at all three time points. At 3mo, 10 ml EDTA  
51  
52 205 whole blood (for DNA isolation), 10 ml EDTA plasma and 8.5 ml serum is collected. At  
53  
54 206 the other two time points, 10 ml EDTA plasma and 8.5 ml serum is collected. All blood  
55  
56 207 samples are collected, processed and stored at -80°C locally in the participating hospitals  
57  
58 208 according to a standard protocol before transportation on dry ice to the Radboud Biobank.  
59  
60

1  
2  
3 209 The blood samples are stored in the Radboud Biobank at -80°C for future analyses of  
4  
5 210 genetic and other biomarkers. Analysis of adiponectin, leptin, and CRP by the Laboratory  
6  
7 211 for Experimental Internal Medicine of Radboudumc using commercially available  
8  
9 212 enzyme-linked immunosorbent assays is planned.

11 213

#### 13 214 *Tumour samples*

15 215 From all patients, permission for collection of tumour specimens is requested for future  
16  
17 216 assessment of tumour characteristics (e.g. tumour necrosis) and acquired genetic alterations  
18  
19 217 (e.g. in the *BAP1* or *PBRM1* genes) [6]. Formalin-fixed paraffin-embedded tumour blocks can  
20  
21 218 be identified by using the PALGA foundation and retrieved using the Dutch National  
22  
23 219 Tissuebank Portal (DNTP) from the local pathology laboratories.

26 220

#### 28 221 *CT scans*

30 222 CT scans are retrieved from medical records of all patients for the assessment of body  
31  
32 223 composition. Diagnostic CT scans are available from almost all RCC patients as they are used  
33  
34 224 for diagnosis and staging of the disease. If available, follow-up CT scans are collected as well.  
35  
36 225 From these CT scans, cross-sectional areas (cm<sup>2</sup>) and mean radiodensity of SM, VAT, SAT  
37  
38 226 and IMAT are quantified at the landmark level of the third lumbar vertebra (L3).

41 227

#### 43 228 *Clinical data*

45 229 Information about disease characteristics and treatment for the initial tumour and subsequent  
46  
47 230 recurrences is collected from the medical records by data managers of the Netherlands Cancer  
48  
49 231 Registry. Information about tumour characteristics includes incidence date, clinical (cTNM) and  
50  
51 232 post-surgical (pTNM) stage, Fuhrman grade and morphology. With respect to therapy,  
52  
53 233 information is collected on type of treatment (type of nephrectomy, type of ablation), operation  
54  
55 234 time, blood loss, complications (Clavien-Dindo classification) and length of hospital stay.  
56  
57 235 Furthermore, data on performance status (e.g. WHO performance status, ASA score) are  
58  
59 236 collected.

1  
2  
3 237  
4  
5 238 Data on clinical outcomes, i.e. recurrence and progression with dates of diagnosis, stage and  
6  
7 239 Fuhrman grade, and survival, are also collected. We will continue to collect further information  
8  
9 240 on these clinical outcomes in the future to evaluate their association with body composition  
10  
11 241 features, lifestyle habits and circulating biomarkers.

12  
13  
14 242

15 243 *Power calculation and data analyses*

16  
17 244 The power calculation of this study is based on our initial research question, i.e. the cross-  
18  
19 245 sectional association of patient and tumour characteristics, lifestyle habits, and circulating  
20  
21 246 concentrations of biomarkers with body composition features. With 369 patients, we will have  
22  
23 247 sufficient power ( $\geq 80\%$ ) to detect a multiple correlation coefficient of 0.30 (Cohen's  $f^2=0.10$  for  
24  
25 248 patient and tumour characteristics, dietary and lifestyle habits, and circulating concentrations  
26  
27 249 of biomarkers with body composition features), corresponding to a small ( $f^2=0.02$ ) to medium  
28  
29 250 ( $f^2=0.15$ ) effect size [47]. This power calculation is based on 276 stage I-III patients (assuming  
30  
31 251 75% available and analyzable CT scans), 19 predictor variables, and 3 body composition  
32  
33 252 features as outcome variables (cross-sectional area and radiodensity of SM and cross-  
34  
35 253 sectional area of VAT). For the power calculation, we correct for multiplicity (3 body  
36  
37 254 composition features) by using the Bonferroni corrected alpha of 0.05/3.

38  
39 255 Patient characteristics were described using means and standard deviations (SD), medians  
40  
41 256 and interquartile ranges (IQR), or total numbers and percentages where appropriate.  
42  
43 257 Differences in sociodemographic and clinical characteristics between participants and non-  
44  
45 258 participants were evaluated with chi-squared tests. Two-sided p-values  $< 0.05$  were considered  
46  
47 259 statistically significant. Multiple linear regression analyses will be used to estimate the cross-  
48  
49 260 sectional association of patient and tumor characteristics, lifestyle habits, and biomarkers with  
50  
51 261 body composition features. Longitudinal associations of body composition features, lifestyle  
52  
53 262 habits and biomarkers with HRQoL will be assessed using linear mixed models. Logistic  
54  
55 263 regression and Cox proportional hazard analyses will be used to estimate the association of  
56  
57  
58  
59  
60

1  
2  
3 264 body composition features, lifestyle habits and biomarkers with other clinical outcomes. All  
4  
5 265 statistical analyses will be conducted in R.  
6

7 266

## 9 267 **FINDINGS TO DATE**

### 11 268 **Characteristics of study participants**

13 269 From January 2018 to June 2021, 882 patients diagnosed with stage I-III RCC were invited to  
14  
15 270 participate. Recruitment was paused between 16 March and 18 May 2020 due to Covid-19  
16  
17 271 measures. In total, 836 patients were eligible and 368 patients agreed to participate and filled  
18  
19 272 out the first or second questionnaires (response rate 44%) (**Figure 2**). The median time  
20  
21 273 between time of treatment and time of the 3mo questionnaire completion was 13 weeks  
22  
23 274 (interquartile range 12-14 weeks). The number of questionnaires, ActivPal measurements and  
24  
25 275 blood samples available at 3mo are also shown in **Figure 2**.  
26  
27

28 276

### 30 277 **Figure 2** Flowchart of the ReLife study

32 278

34 279 In **Table 2**, the baseline characteristics of the cohort are presented. The mean age of patients  
35  
36 280 was  $62.4 \pm 9.0$  years and 70% was male. Most patients had stage I (65%) and Fuhrman grade  
37  
38 281 2 (50%) disease. The majority was treated with radical (57%) or partial nephrectomy (42%).  
39  
40 282 The majority of participants were overweight (44%) or obese (25%) and 50% were former  
41  
42 283 smokers. Compared to non-participants, participants were less likely to be male but were  
43  
44 284 comparable with respect to age, tumour stage, tumour grade, morphology and type of  
45  
46 285 treatment (**Table 3**).  
47  
48  
49  
50  
51  
52  
53  
54  
55  
56  
57  
58  
59  
60

286 **Table 2.** Baseline characteristics of 368 patients with renal cell cancer included in the ReLife  
287 study

|                                                       |              |
|-------------------------------------------------------|--------------|
| Age at diagnosis (y)                                  | 62.4 ± 9.0   |
| Sex                                                   |              |
| Male                                                  | 257 (70)     |
| Female                                                | 111 (30)     |
| Race                                                  |              |
| White                                                 | 356 (97)     |
| Black                                                 | 1 (0.3)      |
| Asian                                                 | 3 (1)        |
| Other                                                 | 5 (1)        |
| Missing                                               | 3 (1)        |
| Educational level <sup>a</sup>                        |              |
| Low                                                   | 151 (41)     |
| Medium                                                | 115 (31)     |
| High                                                  | 98 (27)      |
| Missing                                               | 4 (1)        |
| Paid occupation                                       |              |
| Yes                                                   | 170 (46)     |
| No                                                    | 195 (53)     |
| Missing                                               | 3 (1)        |
| Living situation                                      |              |
| Alone                                                 | 48 (13)      |
| With partner                                          | 228 (62)     |
| With partner and kids                                 | 81 (22)      |
| Alone, but with kids                                  | 8 (2)        |
| Missing                                               | 3 (1)        |
| BMI (kg/m <sup>2</sup> )                              | 27.6 ± 4.7   |
| BMI (kg/m <sup>2</sup> )                              |              |
| Underweight (≤18.5)                                   | 1 (0.3)      |
| Normal weight (18.5-25)                               | 110 (30)     |
| Overweight (25-≤30)                                   | 163 (44)     |
| Obese (>30)                                           | 91 (25)      |
| Missing                                               | 3 (1)        |
| Waist circumference (cm) <sup>b</sup>                 | 101.2 ± 12.1 |
| Hip circumference (cm) <sup>b</sup>                   | 102.1 ± 9.5  |
| Cigarette smoking status                              |              |
| Current                                               | 43 (12)      |
| Former                                                | 185 (50)     |
| Never                                                 | 137 (37)     |
| Missing                                               | 3 (1)        |
| Alcohol consumption (g/d)                             |              |
| 0                                                     | 104 (28)     |
| >0-10                                                 | 145 (39)     |
| >10                                                   | 101 (27)     |
| Missing                                               | 18 (5)       |
| Total moderate-to-vigorous physical activity (min/wk) |              |
| <75                                                   | 27 (7)       |
| 75-150                                                | 142 (39)     |
| ≥150                                                  | 193 (52)     |
| Missing                                               | 6 (2)        |
| Tumor stage                                           |              |
| I                                                     | 238 (65)     |
| II                                                    | 55 (15)      |

|                       |          |
|-----------------------|----------|
| III                   | 75 (20)  |
| Fuhrman grade         |          |
| 1                     | 49 (13)  |
| 2                     | 185 (50) |
| 3                     | 67 (18)  |
| 4                     | 23 (6)   |
| unknown               | 44 (12)  |
| Treatment             |          |
| Radical nephrectomy   | 210 (57) |
| Partial nephrectomy   | 152 (41) |
| Ablation <sup>c</sup> | 6 (2)    |
| Comorbidities         |          |
| 0                     | 54 (15)  |
| 1                     | 85 (23)  |
| ≥2                    | 226 (61) |
| Missing               | 3 (1)    |

Values are mean ± SD or n (%).

<sup>a</sup> Low (primary, secondary, vocational education), medium (intermediate vocational education, higher general secondary education, pre-university education), high (university of vocational education, university)

<sup>b</sup> Values for 8 participants were missing

<sup>c</sup> Other treatment consists of cryoablation (n=2), radiofrequency ablation (n=3) and microwave ablation (n=1)

**Table 3.** Comparison of demographic and clinical characteristics of 368 patients with renal cell cancer included in the ReLife study and 468 invited non-participants

|                          | Participants | Non-participants | P-value <sup>a</sup> |
|--------------------------|--------------|------------------|----------------------|
| N                        | 368          | 468              |                      |
| Age category (y)         |              |                  |                      |
| 18-44                    | 14 (4)       | 28 (6)           | 0.34                 |
| 45-64                    | 180 (49)     | 218 (47)         |                      |
| 65-75                    | 174 (47)     | 222 (47)         |                      |
| Sex                      |              |                  |                      |
| Male                     | 257 (70)     | 360 (77)         | 0.02                 |
| Female                   | 111 (30)     | 108 (23)         |                      |
| Tumor stage              |              |                  |                      |
| I                        | 238 (65)     | 298 (64)         | 0.51                 |
| II                       | 55 (15)      | 61 (13)          |                      |
| III                      | 75 (20)      | 109 (23)         |                      |
| Fuhrman grade            |              |                  |                      |
| 1                        | 49 (13)      | 86 (18)          | 0.32                 |
| 2                        | 185 (50)     | 219 (47)         |                      |
| 3                        | 67 (18)      | 74 (16)          |                      |
| 4                        | 23 (6)       | 33 (7)           |                      |
| unknown                  | 44 (12)      | 56 (12)          |                      |
| Morphology               |              |                  | 0.97                 |
| Clear cell renal tumour  | 260 (71)     | 338 (72)         |                      |
| Papillary renal tumour   | 48 (13)      | 58 (12)          |                      |
| Chromophobe renal tumour | 25 (7)       | 30 (6)           |                      |
| Other <sup>b</sup>       | 35 (9)       | 42 (9)           |                      |
| Treatment                |              |                  |                      |
| Radical nephrectomy      | 210 (57)     | 272 (58)         | 0.76                 |
| Partial nephrectomy      | 152 (41)     | 191 (41)         |                      |
| Ablation <sup>c</sup>    | 6 (2)        | 5 (1)            |                      |

Values are n (%).

<sup>a</sup> From chi-squared test.

1  
2  
3  
4  
5  
6  
7  
8  
9  
10  
11  
12  
13  
14  
15  
16  
17  
18  
19  
20  
21  
22  
23  
24  
25  
26  
27  
28  
29  
30  
31  
32  
33  
34  
35  
36  
37  
38  
39  
40  
41  
42  
43  
44  
45  
46  
47  
48  
49  
50  
51  
52  
53  
54  
55  
56  
57  
58  
59  
60

299 <sup>b</sup> Other morphology consists of adenocarcinoma with mixed subtypes (n=4 and n=5), eosinophilic solid and cystic  
300 renal cell carcinoma (n=1 and n=0), renal cell carcinoma not otherwise specified (n=28 and n=29), sarcomatoid  
301 renal cell carcinoma (n=2 and n=6), collecting duct carcinoma (n=0 and n=1), and clear cell papillary renal cell  
302 tumour (n=0 and n=1) for participants and non-participants, respectively.  
303 <sup>c</sup> Other treatment consists of cryoablation (n=2 and n=2), radiofrequency ablation (n=3 and n=2), and microwave  
304 ablation (n=1 and n=1) for participants and non-participants, respectively.  
305

For peer review only

## 306 **FUTURE PLANS**

307 We have already started and will first continue to work on the statistical analyses and writing  
308 of manuscripts addressing our main study objectives, i.e. 1) the association of patient and  
309 tumour characteristics, lifestyle habits, and circulating biomarkers with body composition  
310 features, and 2) the association of body composition features, lifestyle habits and circulating  
311 biomarkers with clinical outcomes, including postoperative outcomes (e.g. complications,  
312 length of hospital stay), and HRQoL. Statistical analyses for recurrence, progression, and  
313 survival will be conducted once follow-up is more mature or pooling with similar cohorts  
314 becomes possible.

315

## 316 **STRENGTHS AND LIMITATIONS**

317 To our knowledge, the ReLife study is the first population-based prospective longitudinal  
318 study on lifestyle-related factors and clinical outcomes in patients with localized RCC  
319 worldwide. Comprehensive data on lifestyle-related factors and HRQoL are collected at 3  
320 months, 1 year and 2 years after treatment. Besides questionnaire data on lifestyle-related  
321 factors, also objective data on body composition and physical activity are collected. Data on  
322 sociodemographic variables and comorbidity is available as well. Information on several  
323 clinical outcomes is collected, including postoperative outcomes (e.g. complications, length  
324 of hospital stay), recurrence, progression, survival, and HRQoL. Moreover, blood samples  
325 are collected to measure lifestyle-related, disease-related and genetic biomarkers.

326 Permission is available from participants to use their tumour tissue blocks for assessment of  
327 tumour characteristics and acquired genetic alterations.

328 However, there are also some limitations to this study. As is the case for all longitudinal  
329 studies, participants may drop out during the course of the study, potentially leading to  
330 selection bias. Some variables have missing values which will be addressed using multiple  
331 imputation when applicable. No information on lifestyle-related factors and HRQoL after the  
332 two-years follow-up measurement is available. Power for survival analyses is likely to be

1  
2  
3 333 insufficient and future pooling with other studies may be necessary. Lastly, we did not use  
4  
5 334 RCC-specific measures of HRQoL in our study.

6  
7 335 Results that can be obtained from this study are important to develop personalized evidence-  
8  
9 336 based lifestyle advice for patients with localized RCC to improve their clinical outcomes.

10  
11 337

## 12 13 338 **COLLABORATION**

14  
15 339 The ReLife study group is open for collaborations with national and international colleagues.

16  
17 340 Any person interested in collaborating on the ReLife study or in getting access to ReLife data

18  
19 341 for data analyses can contact the corresponding author. Requests for data will be discussed

20  
21 342 and decided by the ReLife study group and will require a Data Transfer Agreement.

22  
23 343

## 24 25 344 **Abbreviations**

26  
27 345 BMI, body mass index; cTNM: clinical TNM stage; DNTP: Dutch National Tissuebank Portal;

28  
29 346 IKNL: Netherlands Comprehensive Cancer Organisation; IMAT: intramuscular adipose tissue;

30  
31 347 NCR: Netherlands Cancer Registry; PALGA foundation: Pathological Anatomical National

32  
33 348 Automate Archive; pTNM: post-surgical TNM stage; RCC: renal cell cancer; SAT:

34  
35 349 subcutaneous adipose tissue; SD: standard deviation; SM: skeletal muscle; SMD: skeletal

36  
37 350 muscle density; SMI: skeletal muscle index; SQUASH: Short Questionnaire to Assess Health;

38  
39 351 TAT: total adipose tissue; 1y: 1 year after treatment; 2y: 2 years after treatment; 3mo: three

40  
41 352 months after treatment; VAT: visceral adipose tissue.

1  
2  
3 353 **DECLARATIONS**

4  
5 354 **Acknowledgements**

6  
7 355 We are grateful to all the patients who participate in this study and we thank the following  
8  
9 356 hospitals for their involvement in recruitment for the ReLife study: Amphia Ziekenhuis,  
10  
11 357 Breda/Oosterhout (D.K.E. van der Schoot); Ziekenhuis Bernhoven, Uden (A.Q.H.J. Niemer);  
12  
13 358 Canisius-Wilhelmina Ziekenhuis, Nijmegen (D.M. Somford); Catharina Ziekenhuis,  
14  
15 359 Eindhoven (W.A. Scheepens); Elisabeth-TweeSteden Ziekenhuis, Tilburg/Waalwijk (P.J.M.  
16  
17 360 Kil, B.P. Wijsman); Elkerliek Ziekenhuis, Helmond (P.J. van Hest); Gelre Ziekenhuizen,  
18  
19 361 Apeldoorn/Zutphen (D.M. Bochove-Overgaauw); Jeroen Bosch Ziekenhuis, 's-  
20  
21 362 Hertogenbosch (S. van der Meer); Maasziekenhuis Pantein, Boxmeer (E. van Boven);  
22  
23 363 Maxima Medisch Centrum, Veldhoven/Eindhoven (L.M.C.L. Fossion, K. de Laet); Meander  
24  
25 364 Medisch Centrum, Amersfoort (F.S. van Rey); Radboudumc, Nijmegen; Rijnstate,  
26  
27 365 Arnhem/Velp/Zevenaar (G.A.H.J Smits); Slingeland Ziekenhuis, Doetinchem (A.D.H.  
28  
29 366 Geboers); St. Jansdal Ziekenhuis, Harderwijk (W.J. Kniestedt); UMC Utrecht (R.P. Meijer);  
30  
31 367 Ziekenhuis Gelderse Vallei, Ede (M.D.H. Kortleve); Ziekenhuisgroep Twente,  
32  
33 368 Almelo/Hengelo (S. Stomps). In addition, we thank Ms. Ivy Beeren, Ms. Monique  
34  
35 369 Eijgenberger, Ms. Jolanda van Haren and Ms. Ursula Oldenhof for their assistance in data  
36  
37 370 collection. We also thank the data managers of the Netherlands Cancer Registry held by the  
38  
39 371 Netherlands Comprehensive Cancer Organisation (IKNL) for inviting patients and collecting  
40  
41 372 the clinical data.  
42  
43  
44

45 373

46  
47 374 **Authors' contributions**

48  
49 375 AV, EK, JPMS, JSFM, KKHA, and LALMK contributed to the conception and design of the  
50  
51 376 study. AV provides overall study management and coordinates the project. JSFM contributed  
52  
53 377 to data collection. AV and JSFM drafted the manuscript. All authors have critically read and  
54  
55 378 revised the manuscript. All authors approved the final version of the manuscript.  
56

57  
58 379

59  
60 380 JSFM - Jake. S.F. Maurits

1  
2  
3 381 JPMS - J.P. Michiel Sedelaar  
4

5 382 KKHA - Katja K.H. Aben  
6

7 383 EK - Ellen Kampman  
8

9 384 LALAMK - Lambertus A.L.M. Kiemeneij  
10

11 385 AV - Alina Vrieling  
12

13  
14 386

15  
16 387 **Funding**

17  
18 388 This project is funded by the Dutch Cancer Society (KUN 2015-7948). Sponsors were not  
19  
20 389 involved in the study design nor will they be in the collection, analysis, and interpretation of  
21  
22 390 data, or in the publications that will result from this study.  
23

24 391

25  
26 392 **Competing interests**

27  
28 393 The authors declare that they have no competing interests.  
29

30 394

31  
32 395 **Ethics approval and consent to participate**

33  
34 396 The study protocol has been approved on March 2, 2017 by the Committee for Human  
35  
36 397 Research region Arnhem-Nijmegen (CMO 2016-3078). Patients who agreed to participate in  
37  
38 398 the study provided a written informed consent.  
39

40 399

41  
42  
43 400 **Consent for publication**

44  
45 401 Not applicable.  
46

47 402

48  
49 403 **Availability of data and material**

50  
51 404 Data and material are not yet available since data collection has not been completed yet.

52  
53 405 After completion of data collection, data will be made available by the corresponding author  
54  
55 406 upon reasonable request.  
56

57  
58 407  
59  
60

## 408 REFERENCES

1. Capitanio U, Bensalah K, Bex A, Boorjian SA, Bray F, Coleman J, Gore JL, Sun M, Wood C, Russo P. Epidemiology of Renal Cell Carcinoma. *Eur Urol* 2019;75:74-84.
2. van de Schans SA, Aben KK, Mulders PF, Haanen JB, van Herpen C, Verhoeven RH, Karim-Kos HE, Oosterwijk E, Kiemeny LA. Modest improvement in 20 years of kidney cancer care in the Netherlands. *Eur J Cancer* 2012;48:1822-30.
3. Sung H, Ferlay J, Siegel RL, Laversanne M, Soerjomataram I, Jemal A, Bray F. Global Cancer Statistics 2020: GLOBOCAN Estimates of Incidence and Mortality Worldwide for 36 Cancers in 185 Countries. *CA Cancer J Clin* 2021;71:209-49.
4. Netherlands Cancer Registry (NCR), Netherlands Comprehensive Cancer Organisation (IKNL), derived via [www.iknl.nl/en/ncr/ncr-data-figures](http://www.iknl.nl/en/ncr/ncr-data-figures) [31 January 2023].
5. Chow WH, Dong LM, Devesa SS. Epidemiology and risk factors for kidney cancer. *Nat Rev Urol* 2010;7:245-57.
6. Ljungberg B, Albiges L, Abu-Ghanem Y, Bedke J, Capitanio U, Dabestani S, Fernandez-Pello S, Giles RH, Hofmann F, Hora M, Klatte T, Kuusk T, Lam TB, Marconi L, Powles T, Tahbaz R, Volpe A, Bex A. European Association of Urology Guidelines on Renal Cell Carcinoma: The 2022 Update. *Eur Urol* 2022;82:399-410.
7. Dabestani S, Marconi L, Kuusk T, Bex A. Follow-up after curative treatment of localised renal cell carcinoma. *World J Urol* 2018;36:1953-9.
8. Volpe A, Patard JJ. Prognostic factors in renal cell carcinoma. *World J Urol* 2010;28:319-27.
9. Laguna MP, Algaba F, Cadeddu J, Clayman R, Gill I, Gueglio G, Hohenfellner M, Joyce A, Landman J, Lee B, van Poppel H, Clinical Research Office of the Endourological Society Renal Mass S. Current patterns of presentation and treatment of renal masses: a clinical research office of the endourological society prospective study. *J Endourol* 2014;28:861-70.
10. Renehan AG, Tyson M, Egger M, Heller RF, Zwahlen M. Body-mass index and incidence of cancer: a systematic review and meta-analysis of prospective observational studies. *Lancet* 2008;371:569-78.
11. Parkin DM, Boyd L. 8. Cancers attributable to overweight and obesity in the UK in 2010. *Br J Cancer* 2011;105 Suppl 2:S34-7.
12. Lanting CI, de Vroome EM, Elias SG, van den Brandt PA, van Leeuwen FE, Kampman E, Kiemeny LA, Peeters PH, de Vries E, Bausch-Goldbohm RA. [Contribution of lifestyle factors to cancer: secondary analysis of Dutch data over 2010 and a projection for 2020]. *Ned Tijdschr Geneesk* 2014;159:A8085.
13. Choi Y, Park B, Jeong BC, Seo SI, Jeon SS, Choi HY, Adami HO, Lee JE, Lee HM. Body mass index and survival in patients with renal cell carcinoma: a clinical-based cohort and meta-analysis. *Int J Cancer* 2013;132:625-34.
14. Kim LH, Doan P, He Y, Lau HM, Pleass H, Patel MI. A Systematic Review and Meta-Analysis of the Significance of Body Mass Index on Kidney Cancer Outcomes. *J Urol* 2021;205:346-55.
15. Mourtzakis M, Prado CM, Lieffers JR, Reiman T, McCargar LJ, Baracos VE. A practical and precise approach to quantification of body composition in cancer patients using computed tomography images acquired during routine care. *Appl Physiol Nutr Metab* 2008;33:997-1006.
16. Shen W, Punyanitya M, Wang Z, Gallagher D, St-Onge MP, Albu J, Heymsfield SB, Heshka S. Total body skeletal muscle and adipose tissue volumes: estimation from a single abdominal cross-sectional image. *J Appl Physiol* (1985) 2004;97:2333-8.
17. Shen W, Punyanitya M, Wang Z, Gallagher D, St-Onge MP, Albu J, Heymsfield SB, Heshka S. Visceral adipose tissue: relations between single-slice areas and total volume. *Am J Clin Nutr* 2004;80:271-8.
18. Weerink LBM, van der Hoorn A, van Leeuwen BL, de Bock GH. Low skeletal muscle mass and postoperative morbidity in surgical oncology: a systematic review and meta-analysis. *J Cachexia Sarcopenia Muscle* 2020;11:636-49.

- 1  
2  
3 459 19. Xiao J, Mazurak VC, Olobatuyi TA, Caan BJ, Prado CM. Visceral adiposity and cancer survival:  
4 460 a review of imaging studies. *Eur J Cancer Care (Engl)* 2018;27:e12611.  
5 461 20. Shachar SS, Williams GR, Muss HB, Nishijima TF. Prognostic value of sarcopenia in adults with  
6 462 solid tumours: A meta-analysis and systematic review. *Eur J Cancer* 2016;57:58-67.  
7 463 21. Aleixo GFP, Shachar SS, Nyrop KA, Muss HB, Malpica L, Williams GR. Myosteatosis and  
8 464 prognosis in cancer: Systematic review and meta-analysis. *Crit Rev Oncol Hematol*  
9 465 2020;145:102839.  
10 466 22. Vrieling A, Kampman E, Knijnenburg NC, Mulders PF, Sedelaar JPM, Baracos VE, Kiemeny LA.  
11 467 Body Composition in Relation to Clinical Outcomes in Renal Cell Cancer: A Systematic Review  
12 468 and Meta-analysis. *Eur Urol Focus* 2018;4:420-34.  
13 469 23. Psutka SP, Boorjian SA, Moynagh MR, Schmit GD, Costello BA, Thompson RH, Stewart-Merrill  
14 470 SB, Lohse CM, Cheville JC, Leibovich BC, Tollefson MK. Decreased Skeletal Muscle Mass is  
15 471 Associated with an Increased Risk of Mortality Following Radical Nephrectomy for Localized  
16 472 Renal Cell Cancer. *J Urol* 2015;195:270-6.  
17 473 24. Maurits JSF, Sedelaar JPM, Mulders PFA, Aben KKH, Kiemeny L, Vrieling A. Skeletal muscle  
18 474 radiodensity and visceral adipose tissue index are associated with survival in renal cell cancer  
19 475 - A multicenter population-based cohort study. *Clin Nutr* 2022;41:131-43.  
20 476 25. Kaneko G, Miyajima A, Yuge K, Yazawa S, Mizuno R, Kikuchi E, Jinzaki M, Oya M. Visceral  
21 477 obesity is associated with better recurrence-free survival after curative surgery for Japanese  
22 478 patients with localized clear cell renal cell carcinoma. *Jpn J Clin Oncol* 2015;45:210-6.  
23 479 26. Naya Y, Zenbutsu S, Araki K, Nakamura K, Kobayashi M, Kamijima S, Imamoto T, Nihei N,  
24 480 Suzuki H, Ichikawa T, Igarashi T. Influence of visceral obesity on oncologic outcome in  
25 481 patients with renal cell carcinoma. *Urol Int* 2010;85:30-6.  
26 482 27. Lee HW, Jeong BC, Seo SI, Jeon SS, Lee HM, Choi HY, Jeon HG. Prognostic significance of  
27 483 visceral obesity in patients with advanced renal cell carcinoma undergoing nephrectomy. *Int*  
28 484 *J Urol* 2015;22:455-61.  
29 485 28. Bredella MA. Sex Differences in Body Composition. *Adv Exp Med Biol* 2017;1043:9-27.  
30 486 29. Wulan SN, Westerterp KR, Plasqui G. Ethnic differences in body composition and the  
31 487 associated metabolic profile: a comparative study between Asians and Caucasians. *Maturitas*  
32 488 2010;65:315-9.  
33 489 30. Keehn A, Srivastava A, Maiman R, Taylor J, DiVito J, Ghavamian R, Stern JM. The relationship  
34 490 between visceral obesity and the clinicopathologic features of patients with small renal  
35 491 masses. *J Endourol* 2015;29:372-6.  
36 492 31. Guo H, Zhao W, Wang A, Li M, Ma H, Wang F, Wang Q, Ba X. The value of sex-specific  
37 493 abdominal visceral fat as measured via CT as a predictor of clear renal cell carcinoma T stage.  
38 494 *Adipocyte* 2021;10:285-92.  
39 495 32. Cumberbatch MG, Rota M, Catto JW, La Vecchia C. The Role of Tobacco Smoke in Bladder  
40 496 and Kidney Carcinogenesis: A Comparison of Exposures and Meta-analysis of Incidence and  
41 497 Mortality Risks. *Eur Urol* 2016;70:458-66.  
42 498 33. Al-Bayati O, Hasan A, Pruthi D, Kaushik D, Liss MA. Systematic review of modifiable risk  
43 499 factors for kidney cancer. *Urol Oncol* 2019;37:359-71.  
44 500 34. Pinthus JH, Kleinmann N, Tisdale B, Chatterjee S, Lu JP, Gillis A, Hamlet T, Singh G, Farrokhyar  
45 501 F, Kapoor A. Lower plasma adiponectin levels are associated with larger tumor size and  
46 502 metastasis in clear-cell carcinoma of the kidney. *Eur Urol* 2008;54:866-73.  
47 503 35. Horiguchi A, Ito K, Sumitomo M, Kimura F, Asano T, Hayakawa M. Decreased serum  
48 504 adiponectin levels in patients with metastatic renal cell carcinoma. *Jpn J Clin Oncol*  
49 505 2008;38:106-11.  
50 506 36. Horiguchi A, Sumitomo M, Asakuma J, Asano T, Zheng R, Asano T, Nanus DM, Hayakawa M.  
51 507 Increased serum leptin levels and over expression of leptin receptors are associated with the  
52 508 invasion and progression of renal cell carcinoma. *J Urol* 2006;176:1631-5.  
53  
54  
55  
56  
57  
58  
59  
60

- 1  
2  
3 509 37. Steffens S, Kohler A, Rudolph R, Eggers H, Seidel C, Janssen M, Wegener G, Schrader M,  
4 510 Kuczyk MA, Schrader AJ. Validation of CRP as prognostic marker for renal cell carcinoma in a  
5 511 large series of patients. *BMC Cancer* 2012;12:399.  
6 512 38. de Martino M, Leitner CV, Hofbauer SL, Lucca I, Haitel A, Shariat SF, Klatter T. Serum  
7 513 Adiponectin Predicts Cancer-specific Survival of Patients with Renal Cell Carcinoma. *Eur Urol*  
8 514 *Focus* 2016;2:197-203.  
9 515 39. Wendel-Vos GW, Schuit AJ, Saris WH, Kromhout D. Reproducibility and relative validity of the  
10 516 short questionnaire to assess health-enhancing physical activity. *Journal of clinical*  
11 517 *epidemiology* 2003;56:1163-9.  
12 518 40. Aaronson NK, Ahmedzai S, Bergman B, Bullinger M, Cull A, Duez NJ, Filiberti A, Flechtner H,  
13 519 Fleishman SB, de Haes JC, et al. The European Organization for Research and Treatment of  
14 520 Cancer QLQ-C30: a quality-of-life instrument for use in international clinical trials in  
15 521 oncology. *J Natl Cancer Inst* 1993;85:365-76.  
16 522 41. de Vries JH, de Groot LC, van Staveren WA. Dietary assessment in elderly people: experiences  
17 523 gained from studies in the Netherlands. *Eur J Clin Nutr* 2009;63 Suppl 1:S69-74.  
18 524 42. Siebelink E, Geelen A, de Vries JH. Self-reported energy intake by FFQ compared with actual  
19 525 energy intake to maintain body weight in 516 adults. *Br J Nutr* 2011;106:274-81.  
20 526 43. Streppel MT, de Vries JH, Meijboom S, Beekman M, de Craen AJ, Slagboom PE, Feskens EJ.  
21 527 Relative validity of the food frequency questionnaire used to assess dietary intake in the  
22 528 Leiden Longevity Study. *Nutr J* 2013;12:75.  
23 529 44. NEVO. NEVO-tabel: Dutch food composition database. Den Haag: RIVM/Voedingscentrum,  
24 530 2011.  
25 531 45. Aaronson NK, Ahmedzai S, Bergman B, Bullinger M, Cull A, Duez NJ, Filiberti A, Flechtner H,  
26 532 Fleishman SB, de Haes JC. The European Organization for Research and Treatment of Cancer  
27 533 QLQ-C30: a quality-of-life instrument for use in international clinical trials in oncology. *JNCI:*  
28 534 *Journal of the National Cancer Institute* 1993;85:365-76.  
29 535 46. Godfrey A, Culhane KM, Lyons GM. Comparison of the performance of the activPAL  
30 536 Professional physical activity logger to a discrete accelerometer-based activity monitor. *Med*  
31 537 *Eng Phys* 2007;29:930-4.  
32 538 47. Faul F, Erdfelder E, Buchner A, Lang AG. Statistical power analyses using G\*Power 3.1: tests  
33 539 for correlation and regression analyses. *Behav Res Methods* 2009;41:1149-60.

540

1  
2  
3  
4  
5  
6  
7  
8  
9  
10  
11  
12  
13  
14  
15  
16  
17  
18  
19  
20  
21  
22  
23  
24  
25  
26  
27  
28  
29  
30  
31  
32  
33  
34  
35  
36  
37  
38  
39  
40  
41  
42  
43  
44  
45  
46  
47  
48  
49  
50  
51  
52  
53  
54  
55  
56  
57  
58  
59  
60

541 **Figure 1.** Timeline and study design of the ReLife study

542 **Figure 2.** Flow chart of the ReLife study

543

For peer review only

## Overview ReLife study



# RE LIFE
